# Supplementary material for: High-resolution metabolomic biomarkers for lung cancer diagnosis and prognosis
Source: PubMed Central journal article supplement (PMC8175557; doi:10.1038/s41598-021-91276-2), 2021-06-03
Supplement: 41598_2021_91276_MOESM1_ESM.pdf [file 41598_2021_91276_MOESM1_ESM.pdf]

**Supplementary Materials**  
**High-resolution Metabolomic Biomarkers for Lung Cancer Diagnosis and Prognosis**

Shi-ang Qi<sup>1,2</sup>, Qian Wu<sup>3,4</sup>, Zhenpu Chen<sup>2</sup>, Wei Zhang<sup>1</sup>, Yongchun Zhou<sup>2</sup>, Kaining Mao<sup>1</sup>, Jia Li<sup>2</sup>, Yuanyuan Li<sup>3</sup>, Jie Chen<sup>1</sup>, Youguang Huang<sup>2</sup>, Yunchao Huang<sup>2</sup>

<sup>1</sup> Electrical and Computer Engineering, University of Alberta, Canada

<sup>2</sup> Third Affiliated Hospital of Kunming Medical University (Yunnan Cancer Hospital), Kunming, Yunnan 650118, China

<sup>3</sup> Shanghai Center for Bioinformation Technology & Shanghai Engineering Research Center of Pharmaceutical Translation, Shanghai Industrial Technology Institute, Shanghai 201203, China.

<sup>4</sup> Shanghai Fenglin Clinical Laboratory Co., Ltd, Shanghai 200231, China.

\*Shi-ang Qi and Qian Wu contributed equally, and both are the first authors.

\*\*Corresponding author: Jie Chen, Youguang Huang, and Yunchao Huang; jc65@ualberta.ca (Jie Chen); huangyouguang2008@126.com (Youguang Huang); huangyunchao2013@163.com (Yunchao Huang).

**List of supplementary materials**

Figure S1. The PCA score plots of metabolic profile of QC, health group and lung cancer group.

Figure S2. The OPLS-DA score plots and validation graphs of metabolic profile.

Figure S3. Pathway analysis of the differential metabolites between healthy controls and lung cancer patients

Figure S4. Enrichment analysis based on KEGG of the differential metabolites.

Figure S5. Enrichment analysis based on SMPDB of the differential metabolites.

Table S1. Qualitative identification results of differential plasma metabolites of lung cancer.

Table S2. The combined results of the core differential plasma metabolites of lung cancer.

Table S3. Performance of logistic regression models with various biomarkers for discriminating healthy controls, early-stage patients, and advanced-stage lung cancer patients.

Table S4. Performance of logistic regression models with various biomarkers for discriminating different lung cancer types.

Table S5. Summary of the top 20 significant differential metabolites of lung cancer.

A. Method: The detailed information of metabolomic analyses.

B. Multivariate Modeling: Healthy Control vs. Stage I & II Lung Cancer, Healthy Control vs. Stage III & IV Lung Cancer

C. Linear Relationship for the Logistic Regression Models

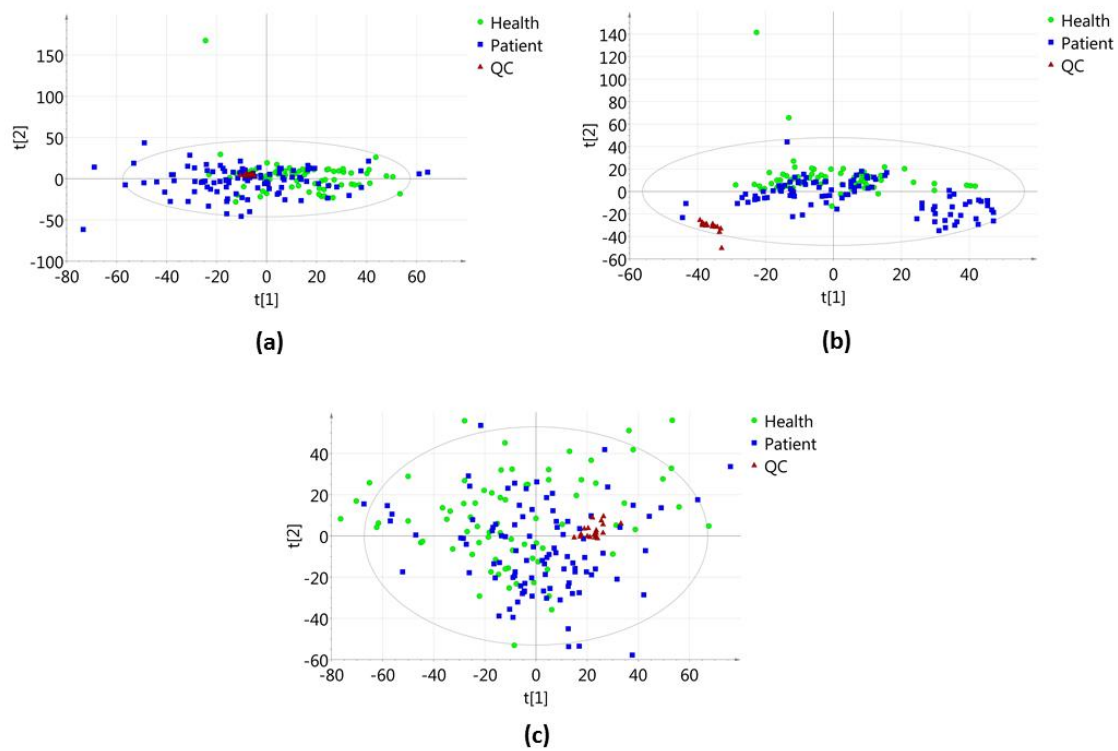

**Figure S1.** The PCA score plots of metabolic profile of QC, health group and lung cancer group. (a) RPLC-ESI- mode; (b) RPLC-ESI+ mode; and (c) HILIC-ESI+/- mode. Legends: brown triangles, QCs; green circles, healthy controls; blue boxes, lung cancer patients

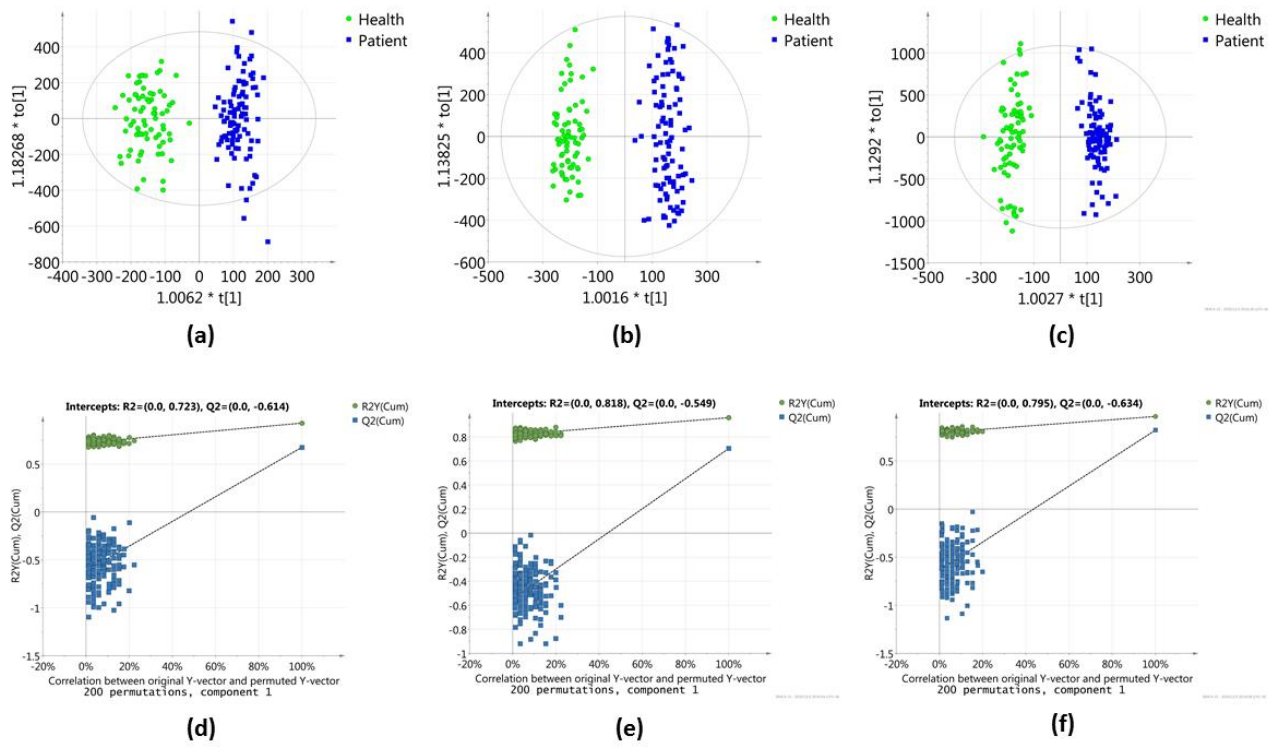

**Figure S2.** The OPLS-DA score plots and validation graphs of metabolic profile. (a) RPLC-ESI- mode; (b) RPLC-ESI+ mode; (c) HILIC-ESI+/- mode; (d), (e), and (f) are the corresponding validation models of the above models. Legends: green circles, healthy controls; blue boxes, lung cancer patients.

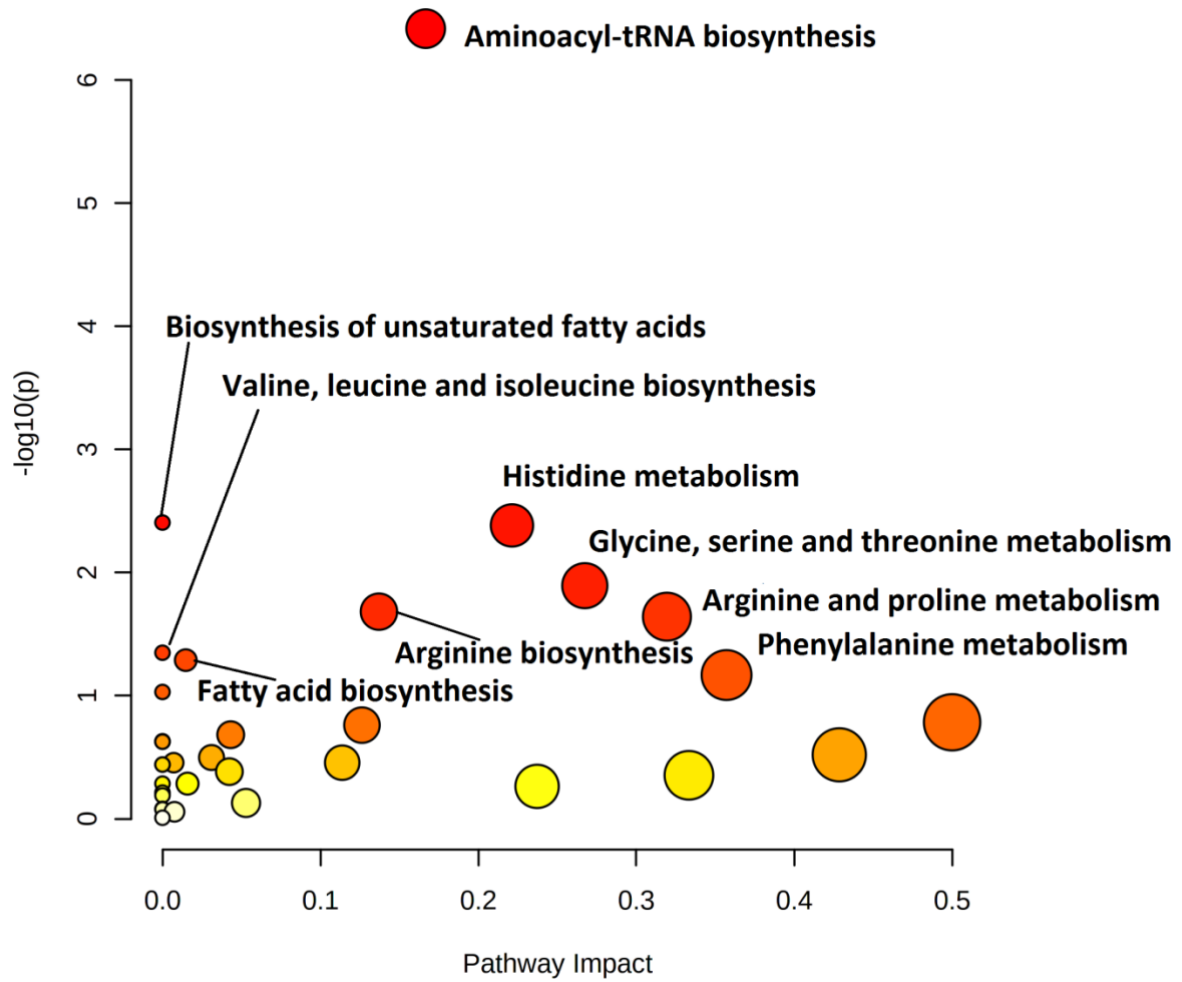

**Figure S3.** Pathway analysis of the differential metabolites between healthy controls and lung cancer patients using MetaboAnalyst 4.0 (<http://www.metaboanalyst.ca/>)

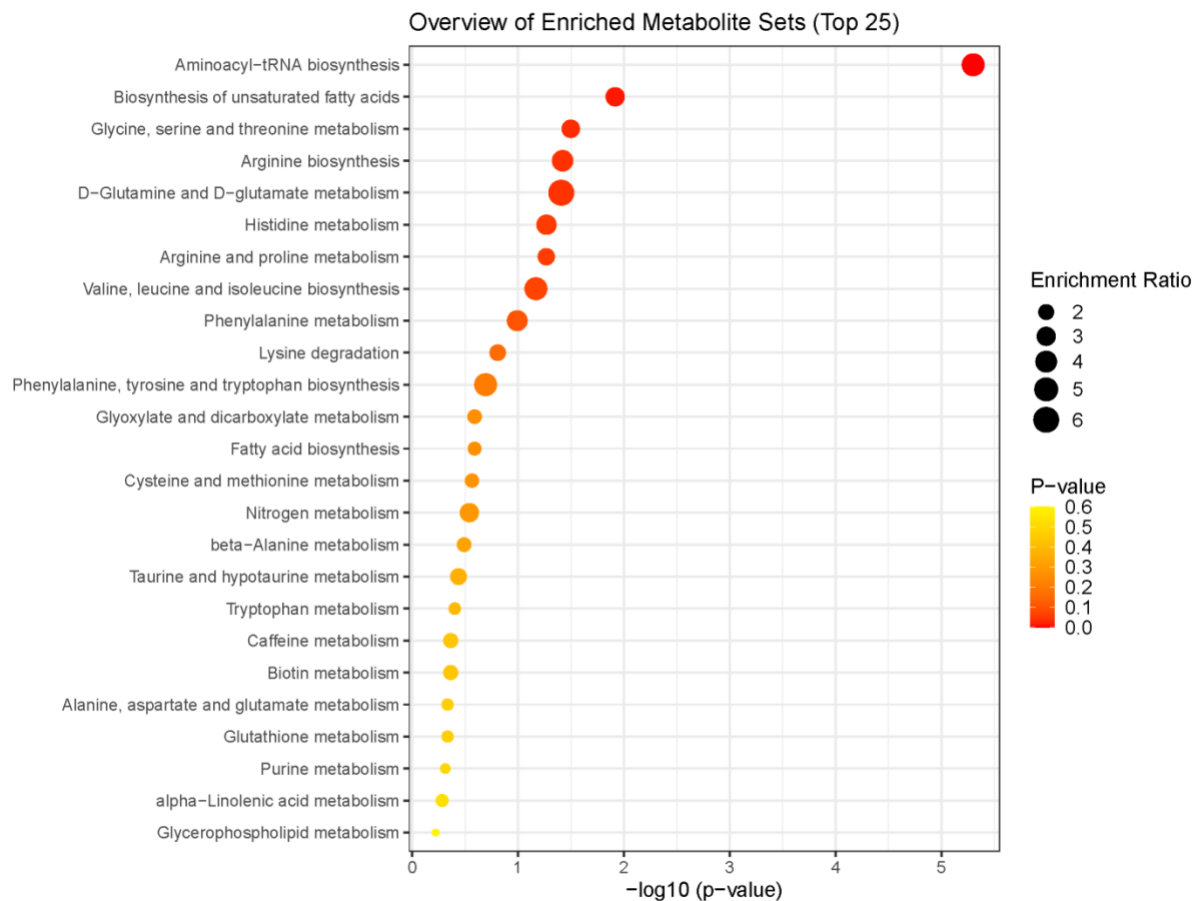

**Figure S4.** Enrichment analysis based on KEGG (Kyoto Encyclopedia of Genes and Genomes) of the differential metabolites between healthy controls and lung cancer patients using MetaboAnalyst 4.0 (<http://www.metaboanalyst.ca/>)

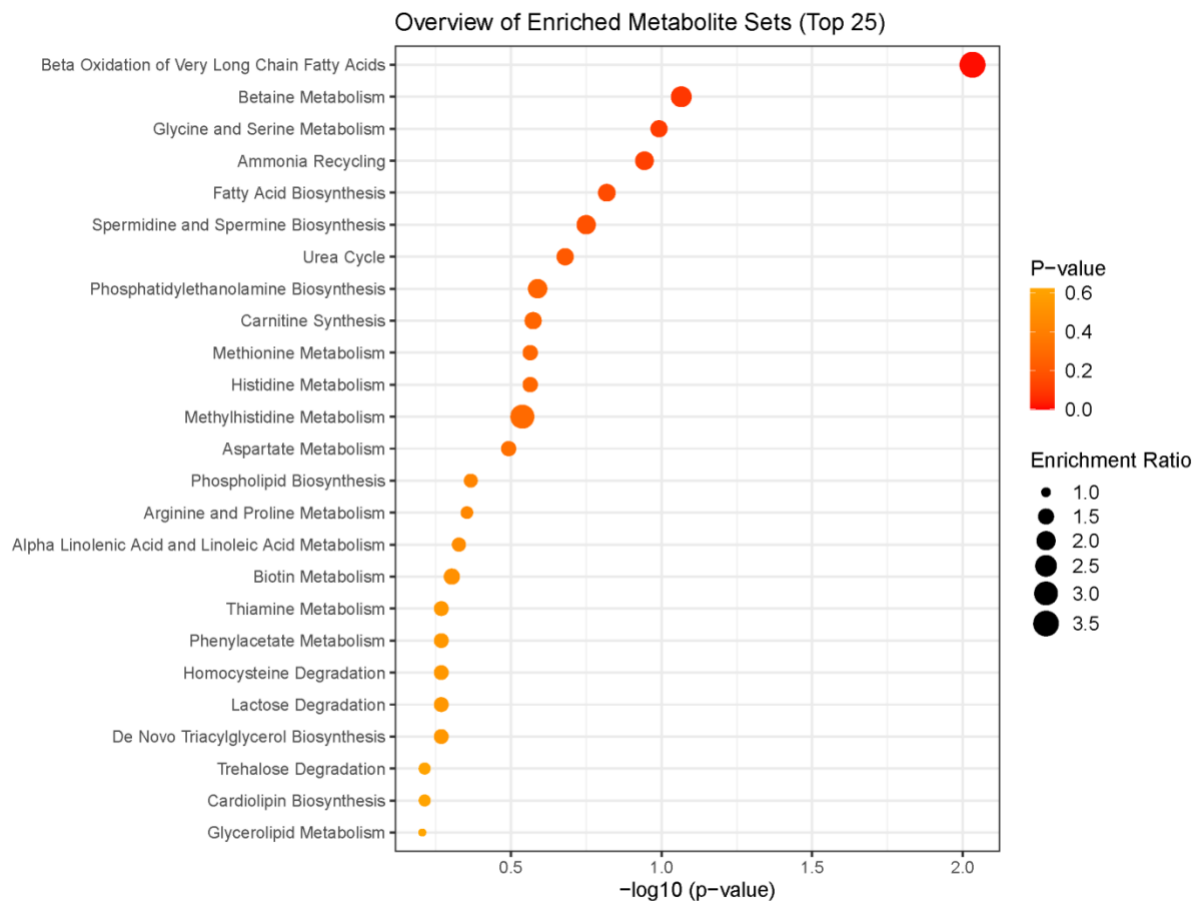

**Figure S5.** Enrichment analysis based on SMPDB (The Small Molecule Pathway Database) of the differential metabolites between healthy controls and lung cancer patients using MetaboAnalyst 4.0 (<http://www.metaboanalyst.ca/>)

Table S1. Qualitative identification results of differential plasma metabolites of lung cancer.

| Mode   | HMDB ID     | Compound Name         | M.W.     | [M+H] <sup>+</sup> | [M-H] <sup>-</sup> | RT (min) | mzCloud | mzVault | VIP   | FC   | PV       | Avg.H    | Avg.P    |
|--------|-------------|-----------------------|----------|--------------------|--------------------|----------|---------|---------|-------|------|----------|----------|----------|
| RP Neg | HMDB0000115 | Glycolic acid         | 76.01453 |                    | 75.00725           | 0.90     |         | 86      | 1.89  | 1.28 | 1.23E-05 | 262.71   | 335.59   |
| RP Neg | HMDB0000700 | Hydroxypropionic acid | 90.03008 |                    | 89.0228            | 1.06     |         | 79      | 2.57  | 1.66 | 3.72E-10 | 149.80   | 248.02   |
| RP Neg | HMDB0001429 | Phosphate             | 97.96567 |                    | 96.95839           | 0.87     |         | 83.9    | 1.08  | 1.11 | 2.46E-02 | 415.40   | 460.75   |
| RP Neg | METPA0228   | 4-Oxoproline          | 129.0411 |                    | 128.0338           | 0.90     | 64.3    | 80.8    | 2.60  | 1.33 | 1.86E-10 | 298.36   | 395.66   |
| RP Neg | HMDB0000687 | L-Leucine             | 131.0931 |                    | 130.0858           | 1.01     | 70.4    | 80.8    | 1.33  | 1.35 | 1.10E-02 | 172.71   | 232.77   |
| RP Neg | HMDB0000482 | Caprylic acid         | 144.1136 |                    | 143.1063           | 3.28     | 75.1    |         | 1.99  | 0.80 | 1.13E-02 | 618.12   | 495.08   |
| RP Neg | HMDB0000208 | Oxoglutaric acid      | 146.0205 |                    | 145.0132           | 0.89     |         |         | 2.66  | 1.13 | 3.14E-02 | 2239.21  | 2521.50  |
| RP Neg | HMDB0003011 | O-Acetylserine        | 147.0517 |                    | 146.0444           | 0.89     |         |         | 3.15  | 1.38 | 2.59E-12 | 348.48   | 480.09   |
| RP Neg | HMDB0000177 | L-Histidine           | 155.0682 |                    | 154.0609           | 1.12     |         |         | 1.27  | 2.09 | 1.39E-04 | 35.83    | 74.84    |
| RP Neg | HMDB0000847 | Pelargonic acid       | 158.1294 |                    | 157.1221           | 3.97     | 58.8    |         | 2.90  | 0.81 | 4.09E-04 | 986.60   | 798.23   |
| RP Neg | HMDB0000849 | Rhamnose              | 164.0677 |                    | 163.0604           | 0.95     |         |         | 2.84  | 1.44 | 2.00E-05 | 369.53   | 532.99   |
| RP Neg | HMDB0000511 | Capric acid           | 172.1452 |                    | 171.1379           | 4.56     | 75.6    |         | 1.35  | 0.83 | 4.45E-03 | 294.63   | 244.62   |
| RP Neg | HMDB0001264 | Dehydroascorbic acid  | 174.0153 |                    | 173.008            | 0.89     |         |         | 1.24  | 1.28 | 5.06E-05 | 120.20   | 153.77   |
| RP Neg | HMDB0033724 | Undecylenic acid      | 184.1452 |                    | 183.138            | 4.45     |         |         | 1.11  | 0.69 | 1.53E-05 | 76.22    | 52.97    |
| RP Neg | HMDB0000947 | Undecanoic acid       | 186.161  |                    | 185.1537           | 5.12     | 76.2    |         | 1.71  | 0.75 | 8.62E-08 | 174.42   | 130.12   |
| RP Neg | HMDB0000094 | Citric acid           | 192.026  |                    | 191.0187           | 0.88     |         |         | 2.79  | 1.13 | 2.17E-02 | 2282.59  | 2581.06  |
| RP Neg | HMDB0000638 | Dodecanoic acid       | 200.1767 |                    | 199.1695           | 5.69     | 70.1    |         | 5.08  | 0.66 | 5.95E-09 | 1036.87  | 679.94   |
| RP Neg | HMDB0028819 | Glutamylglycine       | 204.0737 |                    | 203.0664           | 0.89     |         |         | 1.27  | 2.40 | 2.21E-08 | 19.00    | 45.65    |
| RP Neg | HMDB0000910 | Tridecylic acid       | 214.1926 |                    | 213.1853           | 6.29     | 57.7    |         | 2.05  | 0.74 | 6.59E-13 | 195.84   | 144.40   |
| RP Neg | HMDB0000806 | Myristic acid         | 228.2086 |                    | 227.2013           | 14.52    |         |         | 1.85  | 1.53 | 1.24E-02 | 221.11   | 337.40   |
| RP Neg | HMDB0000826 | Pentadecanoic acid    | 242.2242 |                    | 241.2169           | 7.58     | 80.5    |         | 3.69  | 0.80 | 1.56E-07 | 997.49   | 795.39   |
| RP Neg | HMDB0000220 | Palmitic acid         | 256.2399 |                    | 255.2326           | 8.24     | 78.3    | 91.9    | 40.05 | 0.76 | 5.94E-14 | 72374.11 | 54925.69 |
| RP Neg | No match    | 3-oxopalmitic acid    | 270.2195 |                    | 269.2122           | 5.03     |         |         | 1.01  | 0.70 | 1.47E-08 | 51.05    | 35.88    |

|        |             |                                 |          |  |          |       |      |      |       |      |          |          |          |       |
|--------|-------------|---------------------------------|----------|--|----------|-------|------|------|-------|------|----------|----------|----------|-------|
| RP Neg | HMDB0002259 | Heptadecanoic acid              | 270.2559 |  | 269.2486 | 8.91  |      | 87.5 | 6.02  | 0.68 | 5.28E-12 | 1310.78  | 897.00   |       |
| RP Neg | No match    | Juniperic acid                  | 272.2352 |  | 271.2279 | 4.94  |      |      | 1.14  | 0.62 | 1.82E-12 | 39.89    | 24.79    |       |
| RP Neg | HMDB0000207 | Oleic acid                      | 282.2559 |  | 281.2486 | 8.72  | 82.7 | 96.7 | 1.82  | 0.86 | 2.09E-02 | 880.44   | 760.02   |       |
| RP Neg | HMDB0000827 | Stearic acid                    | 284.2714 |  | 283.2641 | 9.56  | 82.2 | 88.3 | 29.93 | 0.75 | 2.19E-09 | 46140.02 | 34662.63 |       |
| RP Neg | HMDB0000772 | Nonadecanoic acid               | 298.2871 |  | 297.2798 | 10.19 |      |      | 84.5  | 1.42 | 0.68     | 1.57E-05 | 108.81   | 74.11 |
| RP Neg | HMDB0002212 | Arachidic acid                  | 312.3029 |  | 311.2956 | 10.80 | 91.3 | 88.5 | 4.49  | 0.60 | 2.21E-06 | 794.96   | 474.86   |       |
| RP Neg | HMDB0002183 | Docosahexaenoic acid            | 328.2402 |  | 327.2329 | 7.22  | 70.2 | 74.7 | 1.98  | 0.82 | 8.75E-03 | 666.30   | 548.30   |       |
| RP Neg | No match    | 3',5'-Cyclic IMP                | 330.037  |  | 329.0297 | 0.85  |      |      | 11.97 | 1.21 | 9.22E-07 | 12504.13 | 15069.34 |       |
| RP Neg | HMDB0002833 | Testosterone sulfate            | 368.1656 |  | 367.1583 | 2.38  | 75.6 | 77   | 2.27  | 0.71 | 3.59E-03 | 493.34   | 351.77   |       |
| RP Neg | HMDB0000626 | Deoxycholic acid                | 392.2927 |  | 391.2854 | 4.58  | 94.5 |      | 1.31  | 1.74 | 7.94E-03 | 80.62    | 140.07   |       |
| RP Neg | HMDB0000708 | Glycoursodeoxycholic acid       | 449.3141 |  | 448.3068 | 3.16  | 88   |      | 1.50  | 1.50 | 8.65E-03 | 146.72   | 220.54   |       |
| RP Neg | HMDB0011507 | LysoPE(18:2(9Z,12Z)/0:0)        | 477.2853 |  | 476.2781 | 6.00  |      | 85.6 | 1.03  | 1.16 | 4.20E-02 | 288.35   | 333.87   |       |
| RP Neg | HMDB0011130 | LysoPE(18:0/0:0)                | 481.3168 |  | 480.3095 | 7.64  |      | 82.5 | 1.05  | 1.22 | 9.00E-04 | 134.29   | 163.34   |       |
| RP Neg | HMDB0004949 | Cer(d18:1/16:0)                 | 537.512  |  | 536.5047 | 13.23 |      |      | 1.01  | 1.63 | 1.10E-05 | 33.00    | 53.80    |       |
| RP Neg | HMDB0010383 | LysoPC(16:1(9Z)/0:0)            | 553.338  |  | 552.3308 | 5.77  |      | 82.5 | 1.13  | 1.25 | 2.29E-03 | 146.18   | 182.72   |       |
| RP Neg | HMDB0010382 | LysoPC(16:0/0:0)                | 555.3534 |  | 554.3461 | 6.61  |      | 83.6 | 4.40  | 1.11 | 1.52E-02 | 5947.82  | 6625.92  |       |
| RP Neg | HMDB0002815 | LysoPC(18:1(9Z)/0:0)            | 581.3691 |  | 580.3618 | 6.97  |      | 81.7 | 2.68  | 1.16 | 6.03E-03 | 1425.99  | 1650.94  |       |
| RP Neg | HMDB0010384 | LysoPC(18:0/0:0)                | 583.3849 |  | 582.3776 | 7.96  |      | 80.2 | 3.57  | 1.18 | 1.23E-02 | 2414.28  | 2845.90  |       |
| RP Neg | HMDB0011128 | LysoPC(0:0/18:0)                | 583.385  |  | 582.3777 | 7.63  |      | 82.5 | 1.49  | 1.20 | 1.37E-03 | 300.68   | 360.09   |       |
| RP Neg | HMDB0010395 | LysoPC(20:4(5Z,8Z,11Z,14Z)/0:0) | 603.3536 |  | 602.3463 | 6.09  |      | 76   | 1.77  | 1.19 | 4.10E-03 | 494.02   | 587.55   |       |
| RP Neg | HMDB0009789 | PI(16:0/20:4(5Z,8Z,11Z,14Z))    | 858.5251 |  | 857.5178 | 10.49 |      | 66.7 | 1.04  | 1.28 | 1.35E-02 | 131.96   | 168.64   |       |
| RP Neg | HMDB0009809 | PI(18:0/18:2(9Z,1               | 862.5565 |  | 861.5492 | 11.14 |      | 63.9 | 1.63  | 1.28 | 1.30E-02 | 319.18   | 407.70   |       |



|        |             |                              |          |          |          |       |      |      |      |      |          |          |          |
|--------|-------------|------------------------------|----------|----------|----------|-------|------|------|------|------|----------|----------|----------|
|        |             | 2Z))                         |          |          |          |       |      |      |      |      |          |          |          |
| RP Neg | HMDB0009815 | PI(18:0/20:4(5Z,8Z,11Z,14Z)) | 886.5566 |          | 885.5493 | 11.06 |      | 66.3 | 4.13 | 1.36 | 3.79E-04 | 1125.97  | 1536.42  |
| RP Pos | HMDB0000097 | Choline                      | 103.1003 | 104.1076 |          | 0.79  | 88.7 | 88.9 | 3.76 | 1.22 | 2.74E-08 | 1493.32  | 1819.47  |
| RP Pos | HMDB0000562 | Creatinine                   | 113.0594 | 114.0666 |          | 0.81  | 89.1 | 88.6 | 2.98 | 0.89 | 5.30E-04 | 2808.67  | 2495.14  |
| RP Pos | HMDB0000725 | 4-Hydroxyproline             | 131.0586 | 132.0659 |          | 0.88  | 51.8 | 69.6 | 2.38 | 0.79 | 3.21E-09 | 552.42   | 437.52   |
| RP Pos | HMDB0000687 | L-Leucine                    | 131.0949 | 132.1022 |          | 0.91  | 83.2 | 88.5 | 5.76 | 0.93 | 1.50E-03 | 17317.31 | 16033.02 |
| RP Pos | HMDB0000157 | Hypoxanthine                 | 136.0387 | 137.046  |          | 0.86  | 92.3 | 89.8 | 1.73 | 1.43 | 3.76E-08 | 164.27   | 234.96   |
| RP Pos | HMDB0004827 | Proline betaine              | 143.0949 | 144.1022 |          | 0.82  | 90.6 |      | 3.88 | 0.68 | 7.24E-03 | 2061.99  | 1400.68  |
| RP Pos | HMDB0029737 | Indole-3-carboxaldehyde      | 145.0531 | 146.0604 |          | 2.67  | 82.4 | 86.6 | 1.24 | 1.34 | 3.91E-04 | 172.29   | 230.77   |
| RP Pos | HMDB0000895 | Acetylcholine                | 145.1105 | 146.1178 |          | 0.82  | 50.7 |      | 1.30 | 1.23 | 1.72E-05 | 224.65   | 275.43   |
| RP Pos | HMDB0000696 | L-Methionine                 | 149.0513 | 150.0586 |          | 0.91  | 86.4 | 90.1 | 2.38 | 0.91 | 1.14E-03 | 2414.25  | 2204.02  |
| RP Pos | HMDB0034323 | S-Allyl-L-cysteine           | 161.0514 | 162.0586 |          | 1.35  |      |      | 1.53 | 0.51 | 4.42E-15 | 72.73    | 37.21    |
| RP Pos | HMDB0000721 | Glycylproline                | 172.0851 | 173.0924 |          | 0.85  |      |      | 2.38 | 0.65 | 2.30E-04 | 522.25   | 340.56   |
| RP Pos | HMDB0000517 | L-Arginine                   | 174.1121 | 175.1193 |          | 0.74  | 93.1 | 93.7 | 1.86 | 0.74 | 1.11E-06 | 325.54   | 241.60   |
| RP Pos | HMDB0001046 | Cotinine                     | 176.0952 | 177.1025 |          | 0.90  | 70   | 78   | 1.58 | 0.38 | 6.47E-03 | 164.25   | 62.44    |
| RP Pos | HMDB0000714 | Hippuric acid                | 179.0588 | 180.066  |          | 2.90  | 66.2 |      | 1.12 | 0.46 | 3.07E-03 | 87.58    | 40.28    |
| RP Pos | HMDB0000734 | Indoleacrylic acid           | 187.0637 | 188.071  |          | 2.67  | 93.3 |      | 4.18 | 0.92 | 1.72E-02 | 10986.89 | 10096.17 |
| RP Pos | HMDB0011173 | Glycylhydroxyproline         | 188.08   | 189.0873 |          | 0.98  |      |      | 1.55 | 0.93 | 4.48E-02 | 2111.45  | 1963.98  |
| RP Pos | HMDB0012286 | Prenistene                   | 189.0829 | 190.0902 |          | 2.98  |      |      | 1.46 | 0.54 | 1.24E-18 | 65.65    | 35.29    |
| RP Pos | HMDB0001847 | Caffeine                     | 194.0808 | 195.0881 |          | 2.91  | 96.9 | 85.3 | 4.39 | 0.29 | 5.19E-03 | 1023.15  | 292.90   |
| RP Pos | HMDB0000201 | L-Acetylcarnitine            | 203.1162 | 204.1234 |          | 0.87  | 93.2 | 93.4 | 3.26 | 0.92 | 4.41E-02 | 7732.86  | 7109.96  |
| RP Pos | HMDB0000929 | L-Tryptophan                 | 204.0902 | 205.0974 |          | 2.67  | 92.1 | 93.8 | 4.29 | 0.92 | 1.45E-02 | 11004.71 | 10087.88 |
| RP Pos | HMDB0001388 | alpha-Linolenic acid         | 278.2251 | 279.2323 |          | 11.13 | 80.9 |      | 1.85 | 0.85 | 4.65E-03 | 949.51   | 806.21   |
| RP Pos | HMDB0000305 | Vitamin A                    | 286.2301 | 287.2373 |          | 10.97 |      |      | 1.92 | 0.74 | 2.63E-03 | 550.97   | 405.18   |
| RP Pos | No match    | Acylcarnitine C8:0           | 287.2102 | 288.2175 |          | 5.00  |      | 89.2 | 2.01 | 0.82 | 2.85E-02 | 1229.88  | 1006.69  |
| RP Pos | HMDB0010736 | 3-Oxooctadecanoic acid       | 298.2511 | 299.2584 |          | 11.15 |      |      | 1.76 | 0.57 | 1.11E-11 | 132.18   | 75.87    |

|        |             |                            |          |          |          |       |      |      |      |      |          |          |          |
|--------|-------------|----------------------------|----------|----------|----------|-------|------|------|------|------|----------|----------|----------|
|        |             | c acid                     |          |          |          |       |      |      |      |      |          |          |          |
| RP Pos | No match    | Acylcarnitine C9:1         | 299.2103 | 300.2175 |          | 5.01  |      | 82.6 | 1.16 | 0.73 | 1.27E-04 | 149.12   | 108.47   |
| RP Pos | No match    | 3-hydroxyoctanoylcarnitine | 303.2051 | 304.2124 |          | 3.78  |      |      | 1.01 | 0.74 | 7.03E-04 | 136.85   | 101.46   |
| RP Pos | HMDB0013645 | N,N-Dimethylsphingosine    | 309.3036 | 310.3108 |          | 12.00 | 57.6 |      | 5.12 | 1.71 | 2.30E-07 | 924.88   | 1585.34  |
| RP Pos | No match    | Acylcarnitine C10:1        | 313.2255 | 314.2328 |          | 5.77  |      | 88.9 | 4.20 | 0.46 | 2.06E-03 | 1197.72  | 555.04   |
| RP Pos | No match    | Acylcarnitine C10:1        | 313.2258 | 314.2331 |          | 5.94  |      | 89.9 | 1.21 | 0.69 | 5.95E-03 | 190.74   | 131.65   |
| RP Pos | HMDB0000651 | Decanoylcarnitine          | 315.2416 | 316.2489 |          | 6.25  | 90.2 | 89.4 | 2.38 | 0.77 | 2.74E-02 | 1304.44  | 1000.84  |
| RP Pos | No match    | Acylcarnitine C12:1        | 341.2574 | 342.2647 |          | 6.99  |      | 89.5 | 1.35 | 0.70 | 3.06E-03 | 230.81   | 160.83   |
| RP Pos | No match    | Acylcarnitine C12:0        | 343.273  | 344.2802 |          | 7.51  |      | 88.8 | 1.26 | 0.73 | 2.23E-03 | 227.13   | 166.67   |
| RP Pos | No match    | Acylcarnitine C14:2        | 367.2731 | 368.2803 |          | 7.38  |      | 88.6 | 1.24 | 0.59 | 2.87E-05 | 105.69   | 61.97    |
| RP Pos | No match    | Acylcarnitine C14:1        | 369.2884 | 370.2957 |          | 8.26  |      | 89.1 | 1.30 | 0.74 | 5.79E-03 | 281.61   | 209.33   |
| RP Pos | No match    | Acylcarnitine C14:1        | 369.2887 | 370.296  |          | 8.05  |      | 87.2 | 1.13 | 0.80 | 9.66E-03 | 297.14   | 238.38   |
| RP Pos | HMDB0000277 | Sphingosine 1-phosphate    | 379.2496 | 380.2568 |          | 7.77  |      |      | 2.35 | 1.26 | 3.57E-09 | 454.14   | 574.01   |
| RP Pos | HMDB0006461 | Acylcarnitine C18:2        | 423.3357 | 424.343  |          | 9.40  |      | 85.1 | 4.57 | 1.75 | 6.06E-06 | 811.50   | 1416.73  |
| RP Pos | No match    | Glycochenodeoxycholic acid | 449.315  | 450.3222 |          | 6.54  |      |      | 1.86 | 1.47 | 1.44E-02 | 373.46   | 550.55   |
| RP Pos | HMDB0011128 | LysoPC(0:0/18:0)           | 523.3648 | 524.372  |          | 9.98  |      | 81.8 | 1.98 | 1.14 | 1.96E-02 | 1458.12  | 1666.52  |
| RP Pos | HMDB0010384 | LysoPC(18:0/0:0)           | 523.3648 | 524.3721 |          | 10.22 |      | 74.6 | 4.73 | 1.10 | 2.73E-02 | 12028.17 | 13260.31 |
| RP Pos | HMDB0000054 | Bilirubin                  | 584.264  | 585.2712 |          | 12.25 | 85.6 |      | 1.49 | 0.85 | 2.31E-02 | 782.12   | 661.63   |
| HILIC  | HMDB0000092 | Dimethylglycine            | 103.0638 | 104.0711 | 102.0565 | 4.64  |      |      | 2.07 | 0.73 | 7.62E-03 | 361.37   | 262.61   |

|       |             |                            |          |          |          |       |      |      |       |      |          |          |          |
|-------|-------------|----------------------------|----------|----------|----------|-------|------|------|-------|------|----------|----------|----------|
| HILIC | HMDB0000097 | Choline                    | 103.1002 | 104.1074 | 102.0929 | 4.50  | 93.9 | 90.8 | 7.91  | 1.13 | 3.97E-05 | 7792.09  | 8827.39  |
| HILIC | HMDB0000187 | L-Serine                   | 105.0408 | 106.0481 | 104.0335 | 7.53  |      | 93   | 1.21  | 1.14 | 9.45E-04 | 219.62   | 250.42   |
| HILIC | HMDB0000162 | L-Proline                  | 115.0616 | 116.0688 | 114.0543 | 4.91  |      | 79.8 | 2.07  | 1.11 | 1.48E-02 | 1042.82  | 1162.34  |
| HILIC | HMDB0000043 | Betaine                    | 117.0792 | 118.0865 | 116.072  | 3.89  | 96.7 | 89.4 | 10.28 | 1.13 | 1.09E-03 | 16921.42 | 19101.12 |
| HILIC | HMDB0000167 | L-Threonine                | 119.0565 | 120.0637 | 118.0492 | 6.49  |      | 81.6 | 2.33  | 1.23 | 8.53E-05 | 411.61   | 506.42   |
| HILIC | HMDB0000167 | L-Threonine                | 119.0586 | 120.0659 | 118.0513 | 6.49  | 81.5 | 89.9 | 1.32  | 1.17 | 1.37E-03 | 220.02   | 256.86   |
| HILIC | HMDB0000251 | Taurine                    | 125.0149 | 126.0222 | 124.0076 | 4.57  | 80   | 72.5 | 1.13  | 1.07 | 2.63E-02 | 529.65   | 568.79   |
| HILIC | HMDB0002024 | Imidazoleacetic acid       | 126.0432 | 127.0504 | 125.0359 | 4.67  | 75.6 |      | 1.20  | 1.15 | 1.25E-03 | 196.46   | 226.86   |
| HILIC | METPA0228   | 4-Oxoproline               | 129.0408 | 130.0481 | 128.0336 | 4.19  | 51   | 63.4 | 2.57  | 1.61 | 1.30E-15 | 103.12   | 166.16   |
| HILIC | METPA0228   | 4-Oxoproline               | 129.0409 | 130.0482 | 128.0336 | 3.38  | 63.9 | 81   | 3.75  | 1.42 | 2.65E-10 | 392.17   | 556.22   |
| HILIC | HMDB0000070 | Pipecolic acid             | 129.0791 | 130.0864 | 128.0718 | 13.89 | 87.4 | 88.9 | 2.15  | 1.09 | 2.60E-02 | 1514.47  | 1658.22  |
| HILIC | HMDB0060460 | cis-4-Hydroxy-D-proline    | 131.0583 | 132.0656 | 130.0511 | 11.35 | 58.3 |      | 3.47  | 0.86 | 2.66E-02 | 2591.94  | 2240.20  |
| HILIC | HMDB0061880 | N-Acetyl-beta-alanine      | 131.0585 | 132.0657 | 130.0512 | 10.99 |      |      | 2.68  | 1.74 | 1.45E-04 | 181.31   | 315.00   |
| HILIC | HMDB0000064 | Creatine                   | 131.0697 | 132.077  | 130.0624 | 6.51  | 92.8 | 88.5 | 1.58  | 1.20 | 4.98E-02 | 431.78   | 520.29   |
| HILIC | HMDB0000687 | L-Leucine                  | 131.0948 | 132.102  | 130.0875 | 5.57  | 70.8 | 71.7 | 1.25  | 0.45 | 6.02E-05 | 43.47    | 19.57    |
| HILIC | HMDB0001645 | L-Norleucine               | 131.0948 | 132.1021 | 130.0875 | 3.79  | 87.6 | 93.6 | 1.98  | 1.07 | 4.02E-02 | 1734.64  | 1861.14  |
| HILIC | HMDB0000168 | L-Asparagine               | 132.0518 | 133.059  | 131.0445 | 7.64  | 57.5 | 54.9 | 1.20  | 1.18 | 1.29E-04 | 148.39   | 175.09   |
| HILIC | HMDB0000214 | Ornithine                  | 132.0882 | 133.0954 | 131.0809 | 13.57 | 57.8 | 57.5 | 1.65  | 1.33 | 6.88E-05 | 144.04   | 191.38   |
| HILIC | HMDB0000214 | Ornithine                  | 132.0902 | 133.0975 | 131.0829 | 13.50 | 88.3 | 88.7 | 5.14  | 1.42 | 4.60E-10 | 738.45   | 1047.74  |
| HILIC | HMDB0000943 | Threonic acid              | 136.0368 | 137.044  | 135.0295 | 1.99  |      |      | 2.10  | 1.38 | 5.77E-07 | 167.13   | 230.75   |
| HILIC | HMDB0000157 | Hypoxanthine               | 136.0385 | 137.0458 | 135.0312 | 1.99  | 89   | 85.9 | 5.41  | 1.58 | 1.51E-10 | 579.14   | 916.77   |
| HILIC | HMDB0002820 | Methylimidazoleacetic acid | 140.0588 | 141.066  | 139.0515 | 4.67  | 72.4 |      | 6.15  | 0.39 | 7.05E-05 | 932.57   | 363.79   |
| HILIC | HMDB0240650 | Ectoine                    | 142.0744 | 143.0817 | 141.0672 | 6.03  |      |      | 1.17  | 0.76 | 3.47E-03 | 126.49   | 96.09    |
| HILIC | HMDB0004827 | Proline betaine            | 143.0947 | 144.102  | 142.0874 | 3.84  | 97.7 |      | 7.74  | 0.72 | 2.38E-02 | 6274.29  | 4512.59  |
| HILIC | HMDB0000482 | Caprylic acid              | 144.1133 | 145.1206 | 143.1061 | 1.20  | 60.1 |      | 1.23  | 0.63 | 4.49E-04 | 69.35    | 43.49    |
| HILIC | HMDB0000895 | Acetylcholine              | 145.1105 | 146.1177 | 144.1032 | 7.79  | 88.6 |      | 2.43  | 1.16 | 1.04E-04 | 641.28   | 745.82   |
| HILIC | HMDB0000641 | L-Glutamine                | 146.0694 | 147.0766 | 145.0621 | 4.64  | 58.4 |      | 1.07  | 0.86 | 5.38E-04 | 152.43   | 130.97   |
| HILIC | HMDB0000182 | L-Lysine                   | 146.1057 | 147.113  | 145.0984 | 13.91 | 84.8 | 74.3 | 2.50  | 1.10 | 1.88E-02 | 1830.61  | 2014.57  |

|       |             |                              |          |          |          |       |      |      |      |      |          |         |         |
|-------|-------------|------------------------------|----------|----------|----------|-------|------|------|------|------|----------|---------|---------|
| HILIC | HMDB0000292 | Xanthine                     | 152.0317 | 153.039  | 151.0244 | 2.43  | 78.3 |      | 1.62 | 1.41 | 5.30E-06 | 97.91   | 137.81  |
| HILIC | HMDB0000177 | L-Histidine                  | 155.0685 | 156.0757 | 154.0612 | 7.50  | 68.6 | 90.8 | 3.61 | 1.12 | 5.92E-03 | 2761.65 | 3101.23 |
| HILIC | HMDB0000177 | L-Histidine                  | 155.0701 | 156.0773 | 154.0628 | 7.50  | 92.7 | 92   | 1.73 | 1.10 | 2.70E-02 | 1010.59 | 1106.92 |
| HILIC | HMDB0000847 | Pelargonic acid              | 158.1291 | 159.1364 | 157.1218 | 0.91  |      |      | 1.18 | 0.84 | 3.58E-04 | 159.18  | 133.57  |
| HILIC | HMDB0002038 | N(6)-Methyllysine            | 160.1196 | 161.1268 | 159.1123 | 11.23 |      | 60.9 | 1.31 | 0.84 | 4.10E-03 | 252.30  | 211.70  |
| HILIC | HMDB0002038 | N(6)-Methyllysine            | 160.1197 | 161.1269 | 159.1124 | 11.35 |      | 60.9 | 1.86 | 0.78 | 4.38E-07 | 219.28  | 171.28  |
| HILIC | HMDB0000062 | L-Carnitine                  | 161.1053 | 162.1126 | 160.098  | 6.65  | 97   | 94.2 | 8.75 | 1.17 | 2.17E-06 | 6628.73 | 7767.69 |
| HILIC | HMDB0002070 | 4-Hydroxy-2-oxoglutaric acid | 162.0149 | 163.0222 | 161.0077 | 1.62  |      |      | 1.37 | 0.84 | 8.40E-03 | 304.06  | 255.16  |
| HILIC | HMDB0000897 | 7-Methylguanine              | 165.0652 | 166.0725 | 164.0579 | 2.14  | 91.1 |      | 1.09 | 1.23 | 6.27E-05 | 85.09   | 104.99  |
| HILIC | HMDB0000159 | L-Phenylalanine              | 165.0775 | 166.0847 | 164.0702 | 3.34  | 70.3 | 93.1 | 2.37 | 1.09 | 1.18E-02 | 1792.24 | 1946.52 |
| HILIC | HMDB0059750 | D-Xyonic acid                | 166.0463 | 167.0536 | 165.039  | 4.80  |      |      | 1.10 | 0.80 | 5.31E-03 | 146.95  | 117.73  |
| HILIC | HMDB0000001 | 1-Methylhistidine            | 169.0852 | 170.0925 | 168.0779 | 7.89  | 57.9 | 55.1 | 1.04 | 0.65 | 3.43E-02 | 91.16   | 58.85   |
| HILIC | HMDB0000721 | Glycylproline                | 172.0832 | 173.0905 | 171.0759 | 4.50  |      |      | 5.78 | 0.36 | 4.45E-05 | 772.57  | 281.13  |
| HILIC | HMDB0000721 | Glycylproline                | 172.0844 | 173.0917 | 171.0772 | 4.67  |      |      | 7.18 | 0.37 | 4.61E-05 | 1205.59 | 448.46  |
| HILIC | HMDB0000854 | Formiminoglutamic acid       | 174.0645 | 175.0717 | 173.0572 | 4.66  |      |      | 1.67 | 1.71 | 3.30E-02 | 137.37  | 234.49  |
| HILIC | HMDB0028854 | Glycylvaline                 | 174.0999 | 175.1072 | 173.0926 | 4.13  |      | 50.4 | 2.32 | 0.38 | 2.32E-05 | 124.45  | 47.68   |
| HILIC | HMDB0034365 | L-Theanine                   | 174.1005 | 175.1078 | 173.0932 | 4.64  |      |      | 1.97 | 0.63 | 4.42E-03 | 225.31  | 142.44  |
| HILIC | HMDB0003357 | N2-Acetylmethionine          | 174.1006 | 175.1079 | 173.0933 | 4.37  |      |      | 1.62 | 0.73 | 3.66E-03 | 216.22  | 158.22  |
| HILIC | HMDB0000517 | L-Arginine                   | 174.11   | 175.1173 | 173.1027 | 13.68 | 52   | 69.1 | 1.09 | 0.87 | 7.49E-04 | 181.71  | 158.33  |
| HILIC | HMDB0000517 | L-Arginine                   | 174.1117 | 175.119  | 173.1044 | 13.89 | 89.4 | 86.8 | 2.50 | 0.71 | 4.06E-03 | 487.53  | 344.06  |
| HILIC | HMDB0013287 | Ne,Ne dimethyllysine         | 174.1368 | 175.1441 | 173.1295 | 13.99 |      |      | 2.21 | 1.58 | 1.24E-06 | 126.40  | 199.33  |
| HILIC | HMDB0013287 | Ne,Ne dimethyllysine         | 174.1371 | 175.1444 | 173.1298 | 13.96 |      |      | 2.29 | 1.55 | 1.86E-05 | 159.89  | 247.27  |
| HILIC | HMDB0001046 | Cotinine                     | 176.095  | 177.1023 | 175.0877 | 1.11  | 78.3 | 82.4 | 1.22 | 0.42 | 1.53E-02 | 65.28   | 27.36   |
| HILIC | HMDB0001046 | Cotinine                     | 176.0951 | 177.1024 | 175.0878 | 1.22  | 71.5 | 81.4 | 1.26 | 0.54 | 2.48E-02 | 95.26   | 51.36   |
| HILIC | HMDB0001087 | 5-Methylthioribose           | 180.0448 | 181.0521 | 179.0376 | 0.88  |      |      | 2.37 | 1.55 | 7.37E-04 | 227.30  | 352.62  |

|       |             |                             |          |          |          |       |      |      |      |      |          |         |         |
|-------|-------------|-----------------------------|----------|----------|----------|-------|------|------|------|------|----------|---------|---------|
|       |             | e                           |          |          |          |       |      |      |      |      |          |         |         |
| HILIC | HMDB0006050 | o-Tyrosine                  | 181.0717 | 182.079  | 180.0645 | 4.44  | 55.4 |      | 1.42 | 0.47 | 4.41E-02 | 121.56  | 57.49   |
| HILIC | HMDB0061890 | Pyroglutamylglycine         | 186.0642 | 187.0715 | 185.0569 | 8.82  |      |      | 1.67 | 0.31 | 5.60E-08 | 45.02   | 13.95   |
| HILIC | HMDB0011173 | Glycylhydroxyproline        | 188.0798 | 189.0871 | 187.0725 | 8.82  |      |      | 1.83 | 0.44 | 5.51E-05 | 89.55   | 39.41   |
| HILIC | HMDB0001325 | N6,N6,N6-Trimethyl-L-lysine | 188.1527 | 189.1599 | 187.1454 | 13.89 | 89.6 |      | 1.57 | 1.17 | 1.83E-03 | 332.20  | 388.61  |
| HILIC | No match    | 11-Aminoundecanoic acid     | 201.173  | 202.1803 | 200.1657 | 1.59  |      |      | 1.98 | 0.35 | 1.98E-28 | 38.23   | 13.26   |
| HILIC | HMDB0003334 | Symmetric dimethylarginine  | 202.1433 | 203.1506 | 201.136  | 12.32 | 81.3 | 87.8 | 1.44 | 1.16 | 2.25E-02 | 397.78  | 461.68  |
| HILIC | HMDB0000684 | L-Kynurenine                | 208.0849 | 209.0922 | 207.0776 | 3.58  | 85.9 | 85.4 | 1.02 | 1.20 | 2.28E-04 | 98.88   | 118.98  |
| HILIC | HMDB0002013 | Butyrylcarnitine            | 231.1472 | 232.1544 | 230.1399 | 3.48  |      | 89.2 | 2.27 | 1.24 | 2.09E-02 | 669.86  | 832.36  |
| HILIC | HMDB0001959 | gamma-Aminobutyryllysine    | 231.1585 | 232.1657 | 230.1512 | 4.85  |      |      | 1.08 | 0.08 | 7.48E-10 | 12.32   | 0.94    |
| HILIC | HMDB0029158 | gamma-Glutamylserine        | 234.0843 | 235.0916 | 233.0771 | 10.02 |      |      | 5.40 | 1.17 | 1.63E-03 | 3643.12 | 4254.91 |
| HILIC | HMDB0000192 | L-Cystine                   | 240.0238 | 241.0311 | 239.0165 | 10.92 | 90.7 | 90.4 | 1.29 | 0.72 | 2.37E-07 | 78.43   | 56.13   |
| HILIC | HMDB0013286 | N-Undecanoylglycine         | 243.1836 | 244.1909 | 242.1763 | 0.80  |      |      | 1.40 | 2.07 | 4.50E-06 | 29.10   | 60.31   |
| HILIC | HMDB0000767 | Pseudouridine               | 244.0688 | 245.076  | 243.0615 | 3.22  | 71.3 | 90.8 | 1.11 | 1.13 | 6.80E-04 | 194.22  | 219.55  |
| HILIC | HMDB0000296 | Uridine                     | 244.069  | 245.0762 | 243.0617 | 1.99  | 72.1 | 90.7 | 3.71 | 0.87 | 4.71E-04 | 1967.04 | 1708.26 |
| HILIC | HMDB0028757 | Aspartyl-Leucine            | 246.0853 | 247.0926 | 245.078  | 11.27 |      |      | 2.70 | 0.84 | 9.09E-04 | 932.57  | 784.80  |
| HILIC | HMDB0000086 | Glycerophosphocholine       | 257.1031 | 258.1104 | 256.0958 | 8.02  |      |      | 1.77 | 1.33 | 2.01E-08 | 124.05  | 164.71  |
| HILIC | HMDB0002259 | Heptadecanoic acid          | 270.2553 | 271.2626 | 269.248  | 0.82  |      | 80.7 | 2.01 | 0.73 | 1.67E-09 | 175.11  | 127.55  |
| HILIC | HMDB0011738 | N2-gamma-Glutamylglutamine  | 275.1117 | 276.119  | 274.1045 | 10.28 |      | 67.9 | 1.03 | 1.28 | 3.50E-05 | 66.93   | 85.45   |
| HILIC | HMDB0030964 | Linolenelaidic acid         | 278.226  | 279.2333 | 277.2187 | 1.26  |      |      | 2.30 | 0.82 | 1.00E-03 | 650.33  | 534.65  |

|       |             |                                   |          |          |          |       |      |      |      |      |          |         |          |
|-------|-------------|-----------------------------------|----------|----------|----------|-------|------|------|------|------|----------|---------|----------|
| HILIC | No match    | Acylcarnitine C8:2                | 283.1785 | 284.1858 | 282.1712 | 2.28  |      | 66.1 | 1.26 | 0.88 | 2.77E-04 | 230.56  | 201.76   |
| HILIC | HMDB0000827 | Stearic acid                      | 284.2708 | 285.2781 | 283.2636 | 0.81  | 81.8 | 87.7 | 8.63 | 0.81 | 1.51E-05 | 6285.93 | 5085.12  |
| HILIC | HMDB0061859 | Methyl hexadecanoic acid          | 287.2824 | 288.2897 | 286.2752 | 0.86  | 73.2 |      | 1.69 | 0.36 | 1.83E-02 | 131.89  | 47.11    |
| HILIC | No match    | 3-hydroxyoctanoylcarnitine        | 303.2047 | 304.2119 | 302.1974 | 2.89  |      |      | 1.52 | 0.80 | 9.19E-03 | 300.62  | 240.96   |
| HILIC | No match    | Acylcarnitine C12:0               | 343.2729 | 344.2802 | 342.2656 | 1.47  |      | 86.1 | 1.13 | 0.76 | 8.84E-03 | 128.83  | 97.56    |
| HILIC | HMDB0000175 | Inosinic acid                     | 348.0483 | 349.0555 | 347.041  | 11.11 |      |      | 8.21 | 1.22 | 1.91E-02 | 8777.58 | 10683.41 |
| HILIC | No match    | N-LINOLEOYL-4-AMINO BUTYRIC ACID  | 365.2923 | 366.2996 | 364.285  | 0.81  |      |      | 3.07 | 0.45 | 1.41E-22 | 117.50  | 52.53    |
| HILIC | No match    | Acylcarnitine C14:2               | 367.2725 | 368.2797 | 366.2652 | 1.43  |      | 73.3 | 1.01 | 0.80 | 7.51E-03 | 123.89  | 98.88    |
| HILIC | No match    | N-OLEOYL-4-AMINO BUTYRIC ACID     | 367.3089 | 368.3162 | 366.3016 | 0.81  |      |      | 7.37 | 0.48 | 5.06E-23 | 734.86  | 354.82   |
| HILIC | HMDB0001032 | Dehydroepiandrosterone sulfate    | 368.165  | 369.1723 | 367.1577 | 0.76  |      | 59.5 | 2.32 | 0.70 | 2.66E-03 | 384.82  | 269.81   |
| HILIC | No match    | 3-Hydroxyhexadecadienoylcarnitine | 411.2983 | 412.3056 | 410.291  | 1.69  |      |      | 1.65 | 1.72 | 2.32E-04 | 73.71   | 126.96   |
| HILIC | HMDB0006461 | Acylcarnitine C18:2               | 423.3352 | 424.3425 | 422.3279 | 1.30  |      | 82.8 | 1.03 | 1.33 | 6.03E-07 | 46.27   | 61.42    |
| HILIC | HMDB0000708 | Glycoursodeoxycholic acid         | 449.3133 | 450.3206 | 448.306  | 1.66  | 79.1 |      | 2.86 | 1.52 | 5.65E-03 | 403.05  | 612.46   |
| HILIC | HMDB0000708 | Glycoursodeoxycholic acid         | 449.3134 | 450.3207 | 448.3061 | 1.71  | 79.1 |      | 3.56 | 1.56 | 2.56E-03 | 527.37  | 823.57   |

RT, retention time; VIP, variable important in projection; FC, the fold change, which was calculated as the average of lung cancer patients relative to that of the healthy controls; PV, *p*-value obtained from Student's *t*-test; Avg.H, average normalized intensity of healthy controls samples; Avg.P, average normalized intensity of lung cancer patients samples.

Table S2. The combined results of the core differential plasma metabolites of lung cancer.

| Query                     | Match                     | HMDB        | PubChem  | KEGG   | SMILES                                                                                                  | Comment |
|---------------------------|---------------------------|-------------|----------|--------|---------------------------------------------------------------------------------------------------------|---------|
| Glycolic acid             | Glycolic acid             | HMDB0000115 | 757      | C03547 | <chem>C(C(=O)O)O</chem>                                                                                 | 1       |
| Hydroxypropionic acid     | Hydroxypropionic acid     | HMDB0000700 | 68152    | C01013 | <chem>C(CO)C(=O)O</chem>                                                                                | 1       |
| Phosphate                 | Phosphate                 | HMDB0001429 | 57424078 | C00009 | <chem>[O-]P(=O)([O-])[O-]</chem>                                                                        | 1       |
| 4-Oxoproline              | 4-Oxoproline              | METPA0228   | NA       | C01877 | NA                                                                                                      | 1       |
| L-Leucine                 | L-Leucine                 | HMDB0000687 | 6106     | C00123 | <chem>CC(C)C[C@@H](C(=O)O)N</chem>                                                                      | 1       |
| Caprylic acid             | Caprylic acid             | HMDB0000482 | 379      | C06423 | <chem>CCCCCCCC(=O)O</chem>                                                                              | 1       |
| Pelargonic acid           | Pelargonic acid           | HMDB0000847 | 8158     | C01601 | <chem>CCCCCCCCCC(=O)O</chem>                                                                            | 1       |
| Capric acid               | Capric acid               | HMDB0000511 | 2969     | C01571 | <chem>CCCCCCCCCC(=O)O</chem>                                                                            | 1       |
| Undecanoic acid           | Undecanoic acid           | HMDB0000947 | 8180     | C17715 | <chem>CCCCCCCCCCC(=O)O</chem>                                                                           | 1       |
| Dodecanoic acid           | Dodecanoic acid           | HMDB0000638 | 3893     | C02679 | <chem>CCCCCCCCCCCC(=O)O</chem>                                                                          | 1       |
| Tridecanoic acid          | Tridecanoic acid          | HMDB0000910 | 656741   | C17076 | <chem>CCCCCCCCCCCCC(=O)O</chem>                                                                         | 1       |
| Pentadecanoic acid        | Pentadecanoic acid        | HMDB0000826 | 13849    | C16537 | <chem>CCCCCCCCCCCCCCC(=O)O</chem>                                                                       | 1       |
| Palmitic acid             | Palmitic acid             | HMDB0000220 | 985      | C00249 | <chem>CCCCCCCCCCCCCCCC(=O)O</chem>                                                                      | 1       |
| Heptadecanoic acid        | Heptadecanoic acid        | HMDB0002259 | 10465    | NA     | <chem>CCCCCCCCCCCCCCCCC(=O)O</chem>                                                                     | 1       |
| Oleic acid                | Oleic acid                | HMDB0000207 | 445639   | C00712 | <chem>CCCCCCCC/C=C\CCCCCCCC(=O)O</chem>                                                                 | 1       |
| Stearic acid              | Stearic acid              | HMDB0000827 | 5281     | C01530 | <chem>CCCCCCCCCCCCCCCCC(=O)O</chem>                                                                     | 1       |
| Nonadecanoic acid         | Nonadecanoic acid         | HMDB0000772 | 12591    | C16535 | <chem>CCCCCCCCCCCCCCCCCC(=O)O</chem>                                                                    | 1       |
| Arachidic acid            | Arachidic acid            | HMDB0002212 | 10467    | C06425 | <chem>CCCCCCCCCCCCCCCCCCC(=O)O</chem>                                                                   | 1       |
| Docosahexaenoic acid      | Docosahexaenoic acid      | HMDB0002183 | 445580   | C06429 | <chem>CC/C=C\C/C=C\C/C=C\C/C=C\C/C=C\C/C=C\C/C=C\C\CCC(=O)O</chem>                                      | 1       |
| Testosterone sulfate      | Testosterone sulfate      | HMDB0002833 | 119207   | NA     | <chem>C[C@]12CC[C@H]3[C@H]([C@@H]1CC[C@@H]2OS(=O)(=O)O)CCC4=CC(=O)CC[C@]34C</chem>                      | 1       |
| Deoxycholic acid          | Deoxycholic acid          | HMDB0000626 | 222528   | C04483 | <chem>C[C@H](CCC(=O)O)[C@H]1CC[C@@H]2[C@@]1([C@H](C[C@H]3[C@H]2CC[C@H]4[C@@]3(CC[C@H](C4)O)C)O)C</chem> | 1       |
| Glycoursodeoxycholic acid | Glycoursodeoxycholic acid | HMDB0000708 | 12310288 | NA     | <chem>C[C@H](CCC(=O)NCC(=O)O)[C@H]1CC[C@@H]2[C@@]1(CC[C@H]3[C@H]2[C@H](C[C@H]4[C@@]3(CC[C</chem>        | 1       |

|                             |                             |             |          |        |                                                                                          |   |
|-----------------------------|-----------------------------|-------------|----------|--------|------------------------------------------------------------------------------------------|---|
|                             |                             |             |          |        | <chem>@H](C4O)C)O)C</chem>                                                               |   |
| LysoPE(18:2(9Z,12Z)/0:0)    | LysoPE(18:2(9Z,12Z)/0:0)    | HMDB0011507 | 52925130 | NA     | <chem>CCCCC/C=C\C/C=C\C\CCCCCCCC(=O)OC[C@H](COP(=O)(O)OCCN)O</chem>                      | 1 |
| LysoPE(18:0/0:0)            | LysoPE(18:0/0:0)            | HMDB0011130 | 9547068  | C21484 | <chem>CCCCCCCCCCCCCCCCCCCC(=O)OC[C@H](COP(=O)(O)OCCN)O</chem>                            | 1 |
| LysoPC(16:1(9Z))            | LysoPC(16:1(9Z))            | HMDB0010383 | 24779461 | C04230 | <chem>CCCCCC/C=C\C\CCCCCCCC(=O)OC[C@H](COP(=O)([O-])OCC[N+](C)(C)C)O</chem>              | 1 |
| LysoPC(16:0)                | LysoPC(16:0)                | HMDB0010382 | 460602   | C04230 | <chem>CCCCCCCCCCCCCCCCCCCC(=O)OC[C@H](COP(=O)([O-])OCC[N+](C)(C)C)O</chem>               | 1 |
| LysoPC(18:1(9Z))            | LysoPC(18:1(9Z))            | HMDB0002815 | 16081932 | C04230 | <chem>CCCCCCCC/C=C\C\CCCCCCCC(=O)OC[C@H](COP(=O)([O-])OCC[N+](C)(C)C)O</chem>            | 1 |
| LysoPC(18:0)                | LysoPC(18:0)                | HMDB0010384 | 497299   | C04230 | <chem>CCCCCCCCCCCCCCCCCCCC(=O)OC[C@H](COP(=O)([O-])OCC[N+](C)(C)C)O</chem>               | 1 |
| LysoPC(0:0/18:0)            | LysoPC(0:0/18:0)            | HMDB0011128 | 24779491 | NA     | <chem>CCCCCCCCCCCCCCCCCCCC(=O)O[C@H](CO)COP(=O)([O-])OCC[N+](C)(C)C</chem>               | 1 |
| LysoPC(20:4(5Z,8Z,11Z,14Z)) | LysoPC(20:4(5Z,8Z,11Z,14Z)) | HMDB0010395 | 24779476 | C04230 | <chem>CCCCC/C=C\C/C=C\C/C=C\C/C=C\C\CCCC(=O)OC[C@H](COP(=O)([O-])OCC[N+](C)(C)C)O</chem> | 1 |
| Choline                     | Choline                     | HMDB0000097 | 305      | C00114 | <chem>C[N+](C)(C)CCO</chem>                                                              | 1 |
| L-Serine                    | L-Serine                    | HMDB0000187 | 5951     | C00065 | <chem>C([C@@H](C(=O)O)N)O</chem>                                                         | 1 |
| L-Proline                   | L-Proline                   | HMDB0000162 | 145742   | C00148 | <chem>C1C[C@H](NC1)C(=O)O</chem>                                                         | 1 |
| Betaine                     | Betaine                     | HMDB0000043 | 247      | C00719 | <chem>C[N+](C)(C)CC(=O)[O-]</chem>                                                       | 1 |
| L-Threonine                 | L-Threonine                 | HMDB0000167 | 6288     | C00188 | <chem>C[C@H]([C@@H](C(=O)O)N)O</chem>                                                    | 1 |
| Taurine                     | Taurine                     | HMDB0000251 | 1123     | C00245 | <chem>C(CS(=O)(=O)O)N</chem>                                                             | 1 |
| Imidazoleacetic acid        | Imidazoleacetic acid        | HMDB0002024 | 96215    | C02835 | <chem>C1=C(NC=N1)CC(=O)O</chem>                                                          | 1 |
| Pyroglutamic acid           | Pyroglutamic acid           | HMDB0000267 | 7405     | C01879 | <chem>C1CC(=O)N[C@@H]1C(=O)O</chem>                                                      | 1 |
| Pipecolic acid              | Pipecolic acid              | HMDB0000070 | 849      | C00408 | <chem>C1CCNC(C1)C(=O)O</chem>                                                            | 1 |
| 4-Hydroxyproline            | 4-Hydroxyproline            | HMDB0000725 | 5810     | C01157 | <chem>C1[C@H](CN[C@@H]1C(=O)O)O</chem>                                                   | 1 |
| Creatine                    | Creatine                    | HMDB0000064 | 586      | C00300 | <chem>CN(CC(=O)O)C(=N)N</chem>                                                           | 1 |
| L-Norleucine                | L-Norleucine                | HMDB0001645 | 21236    | C01933 | <chem>CCCC[C@@H](C(=O)O)N</chem>                                                         | 1 |
| L-Asparagine                | L-Asparagine                | HMDB0000168 | 6267     | C00152 | <chem>C([C@@H](C(=O)O)N)C(=O)N</chem>                                                    | 1 |
| Ornithine                   | Ornithine                   | HMDB0000214 | 6262     | C00077 | <chem>C(C[C@@H](C(=O)O)N)CN</chem>                                                       | 1 |
| Hypoxanthine                | Hypoxanthine                | HMDB0000157 | 790      | C00262 | <chem>C1=NC2=C(N1)C(=O)N=CN2</chem>                                                      | 1 |



|                             |                             |             |         |        |                                                                     |   |
|-----------------------------|-----------------------------|-------------|---------|--------|---------------------------------------------------------------------|---|
| Methylimidazoleacetic acid  | Methylimidazoleacetic acid  | HMDB0002820 | 75810   | C05828 | <chem>CN1C=C(N=C1)CC(=O)O</chem>                                    | 1 |
| Proline betaine             | Proline betaine             | HMDB0004827 | 7016563 | C10172 | <chem>C[N+](C)(C)C[C@H]1C(=O)[O-]C</chem>                           | 1 |
| Acetylcholine               | Acetylcholine               | HMDB0000895 | 6060    | C01996 | <chem>CC(=O)OCC[N+](C)(C)C</chem>                                   | 1 |
| L-Glutamine                 | L-Glutamine                 | HMDB0000641 | 5961    | C00064 | <chem>C(CC(=O)N)[C@@H](C(=O)O)N</chem>                              | 1 |
| L-Lysine                    | L-Lysine                    | HMDB0000182 | 5962    | C00047 | <chem>C(CCN)C[C@@H](C(=O)O)N</chem>                                 | 1 |
| Xanthine                    | Xanthine                    | HMDB0000292 | 1188    | C00385 | <chem>C1=NC2=C(N1)C(=O)NC(=O)N2</chem>                              | 1 |
| L-Histidine                 | L-Histidine                 | HMDB0000177 | 6274    | C00135 | <chem>C1=C(NC=N1)C[C@@H](C(=O)O)N</chem>                            | 1 |
| N(6)-Methyllysine           | N(6)-Methyllysine           | HMDB0002038 | 164795  | C02728 | <chem>CNCCCC[C@@H](C(=O)O)N</chem>                                  | 1 |
| L-Carnitine                 | L-Carnitine                 | HMDB0000062 | 2724480 | C00318 | <chem>C[N+](C)(C)C[C@H](CC(=O)[O-])O</chem>                         | 1 |
| 7-Methylguanine             | 7-Methylguanine             | HMDB0000897 | 11361   | C02242 | <chem>CN1C=NC2=C1C(=O)N=C(N2)N</chem>                               | 1 |
| L-Phenylalanine             | L-Phenylalanine             | HMDB0000159 | 6140    | C00079 | <chem>C1=CC=C(C=C1)C[C@@H](C(=O)O)N</chem>                          | 1 |
| 1-Methylhistidine           | 1-Methylhistidine           | HMDB0000001 | 92105   | C01152 | <chem>CN1C=C(N=C1)C[C@@H](C(=O)O)N</chem>                           | 1 |
| Glycyl-Valine               | Glycyl-Valine               | HMDB0028854 | 97417   | NA     | <chem>CC(C)C(NC(=O)CN)C(=O)O</chem>                                 | 1 |
| L-Arginine                  | L-Arginine                  | HMDB0000517 | 6322    | C00062 | <chem>C(C[C@@H](C(=O)O)N)CN=C(N)N</chem>                            | 1 |
| Cotinine                    | Cotinine                    | HMDB0001046 | 408     | NA     | <chem>CN1C(CCC1=O)C2=CN=CC=C2</chem>                                | 1 |
| o-Tyrosine                  | o-Tyrosine                  | HMDB0006050 | 91482   | NA     | <chem>C1=CC=C(C(=C1)CC(C(=O)O)N)O</chem>                            | 1 |
| N6,N6,N6-Trimethyl-L-lysine | N6,N6,N6-Trimethyl-L-lysine | HMDB0001325 | 440120  | C03793 | <chem>C[N+](C)(C)CCCC[C@@H](C(=O)[O-])N</chem>                      | 1 |
| Symmetric dimethylarginine  | Symmetric dimethylarginine  | HMDB0003334 | 169148  | NA     | <chem>CNC(=NC)NCCC[C@@H](C(=O)O)N</chem>                            | 1 |
| L-Kynurenine                | L-Kynurenine                | HMDB0000684 | 161166  | C00328 | <chem>C1=CC=C(C(=C1)C(=O)C[C@@H](C(=O)O)N)N</chem>                  | 1 |
| Myristic acid               | Myristic acid               | HMDB0000806 | 11005   | C06424 | <chem>CCCCCCCCCCCC(=O)O</chem>                                      | 1 |
| Butyrylcarnitine            | Butyrylcarnitine            | HMDB0002013 | 439829  | C02862 | <chem>CCCC(=O)OC(CC(=O)[O-])C[N+](C)(C)C</chem>                     | 1 |
| L-Cystine                   | L-Cystine                   | HMDB0000192 | 67678   | C00491 | <chem>C([C@@H](C(=O)O)N)SSC[C@@H](C(=O)O)N</chem>                   | 1 |
| Pseudouridine               | Pseudouridine               | HMDB0000767 | 15047   | C02067 | <chem>C1=C(C(=O)NC(=O)N1)[C@H]2[C@@H]([C@@H]([C@H]2)(O2)CO)O</chem> | 1 |
| Uridine                     | Uridine                     | HMDB0000296 | 6029    | C00299 | <chem>C1=CN(C(=O)NC1=O)[C@H]2[C@@H]([C@@H]([C@H]2)(O2)CO)O</chem>   | 1 |
| N2-gamma-Glutamylglutamine  | N2-gamma-Glutamylglutamine  | HMDB0011738 | 150914  | C05283 | <chem>C(CC(=O)N[C@@H](CCC(=O)N)C(=O)O)[C@@H](C(=O)O)N</chem>        | 1 |
| Dehydroepiandrosteron       | Dehydroepiandrosteron       | HMDB0001032 | 12594   | C04555 | <chem>C[C@]12CC[C@H]3[C@H]([C@@H]1CCC2=O)CC=C4</chem>               | 1 |

| e sulfate               | one sulfate             |             |          |        | <chem>C@@]3(CC[C@@H](C4)OS(=O)(=O)O)C</chem>                                                                   |   |
|-------------------------|-------------------------|-------------|----------|--------|----------------------------------------------------------------------------------------------------------------|---|
| Linoelaidyl carnitine   | Linoelaidyl carnitine   | HMDB0006461 | 53477834 | NA     | <chem>CCCCC/C=C/C/C=C/C/CCCCCCCC(=O)OC(CC(=O)[O-])C[N+](C)(C)C</chem>                                          | 1 |
| Creatinine              | Creatinine              | HMDB0000562 | 588      | C00791 | <chem>CN1CC(=O)N=C1N</chem>                                                                                    | 1 |
| Inosine                 | Inosine                 | HMDB0000195 | 6021     | C00294 | <chem>C1=NC(=O)C2=C(N1)N(C=N2)[C@H]3[C@@H]([C@@H]([C@H](O3)CO)O)O</chem>                                       | 1 |
| L-Methionine            | L-Methionine            | HMDB0000696 | 6137     | C00073 | <chem>CSCC[C@@H](C(=O)O)N</chem>                                                                               | 1 |
| Hippuric acid           | Hippuric acid           | HMDB0000714 | 464      | C01586 | <chem>C1=CC=C(C=C1)C(=O)NCC(=O)O</chem>                                                                        | 1 |
| Indoleacrylic acid      | Indoleacrylic acid      | HMDB0000734 | 15030923 | NA     | <chem>C1=CC=C2C(=C1)C=C(N2)/C=C/C(=O)O</chem>                                                                  | 1 |
| Caffeine                | Caffeine                | HMDB0001847 | 2519     | C07481 | <chem>CN1C=NC2=C1C(=O)N(C(=O)N2)C</chem>                                                                       | 1 |
| L-Acetylcarnitine       | L-Acetylcarnitine       | HMDB0000201 | 7045767  | C02571 | <chem>CC(=O)OC(CC(=O)[O-])C[N+](C)(C)C</chem>                                                                  | 1 |
| L-Tryptophan            | L-Tryptophan            | HMDB0000929 | 6305     | C00078 | <chem>C1=CC=C2C(=C1)C(=CN2)C[C@@H](C(=O)O)N</chem>                                                             | 1 |
| Alpha-Linolenic acid    | Alpha-Linolenic acid    | HMDB0001388 | 5280934  | C06427 | <chem>CC/C=C\C/C=C\C/C=C\C\CCCCCCCC(=O)O</chem>                                                                | 1 |
| N,N-Dimethylsphingosine | N,N-Dimethylsphingosine | HMDB0013645 | 5282309  | C13914 | <chem>CCCCCCCCCCCC/C=C/[C@H]([C@H](CO)N(C)C)O</chem>                                                           | 1 |
| Decanoylcarnitine       | Decanoylcarnitine       | HMDB0000651 | 10245190 | NA     | <chem>CCCCCCCCCCC(=O)OC(CC(=O)[O-])C[N+](C)(C)C</chem>                                                         | 1 |
| Bilirubin               | Bilirubin               | HMDB0000054 | 21252250 | C00486 | <chem>CC1=C(NC(=C1CCC(=O)O)CC2=C(C(=C(N2)/C=C\3/C(=C(C(=O)N3)C)C=C)C)CCC(=O)O)/C=C\4/C(=C(C(=O)N4)C=C)C</chem> | 1 |

Table S3. Performance of logistic regression models with various biomarkers for discriminating healthy controls, early-stage patients, and advanced-stage lung cancer patients.

|                                      | Top 5 significant metabolites |            | Top 10 significant metabolites |            | Top 20 significant metabolites |            |
|--------------------------------------|-------------------------------|------------|--------------------------------|------------|--------------------------------|------------|
|                                      | Discovery                     | Validation | Discovery                      | Validation | Discovery                      | Validation |
| <b>AUC (healthy controls)</b>        | 0.910 (+/- 0.091)             | 0.858      | 0.961 (+/- 0.069)              | 0.914      | 0.989 (+/- 0.019)              | 0.939      |
| <b>AUC (early-stage patients)</b>    | 0.718 (+/- 0.211)             | 0.717      | 0.733 (+/- 0.134)              | 0.731      | 0.715 (+/- 0.190)              | 0.794      |
| <b>AUC (advanced-stage patients)</b> | 0.751 (+/- 0.161)             | 0.759      | 0.793 (+/- 0.119)              | 0.793      | 0.753 (+/- 0.224)              | 0.815      |
| <b>Accuracy</b>                      | 0.599 (+/- 0.143)             | 0.536      | 0.647 (+/- 0.194)              | 0.551      | 0.626 (+/- 0.228)              | 0.667      |
| <b>Precision</b>                     | 0.613 (+/- 0.213)             | 0.547      | 0.634 (+/- 0.256)              | 0.515      | 0.625 (+/- 0.257)              | 0.648      |
| <b>Recall</b>                        | 0.599 (+/- 0.143)             | 0.536      | 0.647 (+/- 0.194)              | 0.551      | 0.626 (+/- 0.228)              | 0.667      |

Table S4. Performance of logistic regression models with various biomarkers for discriminating different lung cancer types.

|                              | <b>Top 5 significant metabolites</b> | <b>Top 10 significant metabolites</b> | <b>Top 20 significant metabolites</b> |
|------------------------------|--------------------------------------|---------------------------------------|---------------------------------------|
| <b>AUC (healthy control)</b> | 0.891                                | 0.916                                 | 0.973                                 |
| <b>AUC (ADC patients)</b>    | 0.758                                | 0.818                                 | 0.895                                 |
| <b>AUC (SCC patients)</b>    | 0.746                                | 0.810                                 | 0.827                                 |
| <b>AUC (SCLC patients)</b>   | 0.826                                | 0.754                                 | 0.872                                 |
| <b>Accuracy</b>              | 0.731                                | 0.731                                 | 0.826                                 |
| <b>Precision</b>             | 0.651                                | 0.691                                 | 0.819                                 |
| <b>Recall</b>                | 0.731                                | 0.731                                 | 0.826                                 |

Table S5. Summary of the top 20 significant differential metabolites of lung cancer

| Group                                  |       |       |                          |                               | Stage                              |       |       |                              |                                 | Type                                   |       |       |                              |                                 |
|----------------------------------------|-------|-------|--------------------------|-------------------------------|------------------------------------|-------|-------|------------------------------|---------------------------------|----------------------------------------|-------|-------|------------------------------|---------------------------------|
| Metabolite Name                        | Trend | AUC   | P-value (Student t-test) | P-value (Mann-Whitney U test) | Metabolite Name                    | Trend | AUC   | P value (one-way ANOVA test) | P value (Kruskal-Wallis H-test) | Metabolite Name                        | Trend | AUC   | P value (one-way ANOVA test) | P value (Kruskal-Wallis H-test) |
| Palmitic acid <sup>(a)</sup>           | ↓     | 0.860 | 5.94E-14                 | 7.81E-16                      | Palmitic acid <sup>(a)</sup>       | ↓     | 0.767 | 8.08E-16                     | 1.99E-14                        | Palmitic acid <sup>(a)</sup>           | ↓     | 0.783 | 3.99E-15                     | 5.62E-14                        |
| Heptadecanoic acid <sup>(a)</sup>      | ↓     | 0.841 | 5.28E-12                 | 1.90E-14                      | Heptadecanoic acid <sup>(a)</sup>  | ↓     | 0.747 | 5.02E-14                     | 6.56E-13                        | Heptadecanoic acid <sup>(a)</sup>      | ↓     | 0.750 | 8.86E-13                     | 3.75E-12                        |
| 4-Oxoproline <sup>(c)</sup>            | ↑     | 0.833 | 2.65E-10                 | 2.69E-11                      | Ornithine <sup>(c)</sup>           | ↑     | 0.734 | 2.80E-09                     | 1.71E-10                        | Ornithine <sup>(c)</sup>               | ↑     | 0.736 | 1.22E-07                     | 8.76E-10                        |
| Tridecanoic acid <sup>(a)</sup>        | ↓     | 0.811 | 6.59E-13                 | 1.48E-12                      | Tridecanoic acid <sup>(a)</sup>    | ↓     | 0.727 | 4.08E-13                     | 7.33E-12                        | Pentadecanoic acid <sup>(a)</sup>      | ↓     | 0.694 | 1.68E-05                     | 1.04E-05                        |
| Ornithine <sup>(c)</sup>               | ↑     | 0.807 | 4.60E-10                 | 9.74E-12                      | Stearic acid <sup>(a)</sup>        | ↓     | 0.720 | 5.01E-11                     | 2.51E-10                        | Acylcarnitine C8:1 <sup>(b)</sup>      | ↓     | 0.691 | 1.67E-04                     | 8.81E-06                        |
| Pentadecanoic acid <sup>(a)</sup>      | ↓     | 0.799 | 1.56E-07                 | 9.27E-11                      | Hypoxanthine <sup>(c)</sup>        | ↑     | 0.716 | 2.85E-11                     | 3.56E-10                        | Stearic acid <sup>(a)</sup>            | ↓     | 0.690 | 6.27E-10                     | 3.82E-09                        |
| Hypoxanthine <sup>(c)</sup>            | ↑     | 0.794 | 1.51E-10                 | 5.82E-10                      | 4-Oxoproline <sup>(c)</sup>        | ↑     | 0.712 | 8.63E-09                     | 3.29E-10                        | Dodecanoic acid <sup>(a)</sup>         | ↓     | 0.690 | 3.27E-09                     | 3.29E-10                        |
| Stearic acid <sup>(a)</sup>            | ↓     | 0.788 | 2.19E-09                 | 3.66E-11                      | Dodecanoic acid <sup>(a)</sup>     | ↓     | 0.711 | 2.71E-09                     | 1.62E-10                        | N(6)-Methyllysine <sup>(c)</sup>       | ↑     | 0.688 | 2.52E-06                     | 1.33E-06                        |
| Caprylic acid <sup>(c)</sup>           | ↓     | 0.775 | 4.49E-04                 | 1.20E-10                      | Pentadecanoic acid <sup>(a)</sup>  | ↓     | 0.710 | 2.31E-08                     | 7.02E-10                        | N,N-Dimethylsphingosine <sup>(c)</sup> | ↑     | 0.687 | 3.61E-07                     | 3.66E-05                        |
| 4-Hydroxyproline <sup>(b)</sup>        | ↓     | 0.772 | 3.21E-09                 | 1.98E-09                      | 4-Hydroxyproline <sup>(b)</sup>    | ↓     | 0.695 | 4.01E-09                     | 1.87E-08                        | Acylcarnitine C14:3 <sup>(b)</sup>     | ↓     | 0.685 | 4.46E-04                     | 3.87E-05                        |
| Dodecanoic acid <sup>(a)</sup>         | ↓     | 0.768 | 5.95E-09                 | 2.43E-11                      | N(6)-Methyllysine <sup>(c)</sup>   | ↑     | 0.687 | 7.54E-07                     | 9.28E-08                        | Acylcarnitine C10:2 <sup>(b)</sup>     | ↓     | 0.681 | 4.21E-07                     | 3.91E-07                        |
| Acylcarnitine C10:2 <sup>(b)</sup>     | ↓     | 0.765 | 6.29E-08                 | 1.54E-08                      | L-Cystine <sup>(c)</sup>           | ↓     | 0.687 | 1.41E-06                     | 3.63E-08                        | N2,N2-Dimethylguanosine <sup>(c)</sup> | ↑     | 0.680 | 3.24E-08                     | 3.65E-08                        |
| N2,N2-Dimethylguanosine <sup>(c)</sup> | ↑     | 0.753 | 2.98E-08                 | 1.21E-08                      | Acylcarnitine C10:2 <sup>(b)</sup> | ↓     | 0.684 | 1.95E-07                     | 2.40E-07                        | 4-Hydroxyproline <sup>(b)</sup>        | ↓     | 0.678 | 2.35E-09                     | 1.50E-08                        |

|                                      |   |       |          |          |                                        |   |       |          |          |                                           |   |       |          |          |
|--------------------------------------|---|-------|----------|----------|----------------------------------------|---|-------|----------|----------|-------------------------------------------|---|-------|----------|----------|
| Hydroxypropionic acid <sup>(a)</sup> | ↑ | 0.745 | 3.72E-10 | 1.03E-08 | Caprylic acid <sup>(c)</sup>           | ↓ | 0.682 | 3.95E-04 | 6.46E-10 | Myristic acid <sup>(a)</sup>              | ↓ | 0.678 | 2.86E-03 | 5.89E-04 |
| N(6)-Methyllysine <sup>(c)</sup>     | ↑ | 0.745 | 4.38E-07 | 3.53E-08 | N2,N2-Dimethylguanosine <sup>(c)</sup> | ↑ | 0.678 | 3.15E-07 | 2.33E-07 | Biliverdin <sup>(b)</sup>                 | ↓ | 0.673 | 3.62E-03 | 3.25E-05 |
| L-Cystine <sup>(c)</sup>             | ↓ | 0.739 | 2.37E-07 | 2.81E-09 | Acylcarnitine C14:2 <sup>(b)</sup>     | ↓ | 0.677 | 6.31E-05 | 1.06E-06 | L-Kynurenine <sup>(c)</sup>               | ↑ | 0.668 | 1.31E-05 | 3.08E-05 |
| Choline <sup>(b)</sup>               | ↑ | 0.736 | 2.74E-08 | 4.48E-08 | Undecanoic acid <sup>(a)</sup>         | ↓ | 0.676 | 2.46E-08 | 8.27E-08 | Acylcarnitine C12:1 <sup>(b)</sup>        | ↓ | 0.665 | 1.38E-04 | 1.08E-04 |
| Xanthine <sup>(c)</sup>              | ↑ | 0.735 | 5.30E-06 | 7.28E-08 | N6-Acetyl-L-lysine <sup>(c)</sup>      | ↑ | 0.674 | 1.62E-05 | 2.46E-06 | Alpha-Linolenic acid <sup>(a)</sup>       | – | 0.665 | 5.12E-03 | 2.97E-04 |
| Arachidic acid <sup>(a)</sup>        | ↓ | 0.731 | 2.21E-06 | 3.04E-07 | Hydroxypropionic acid <sup>(a)</sup>   | ↑ | 0.673 | 4.01E-09 | 9.85E-08 | 5-Hydroxyindoleacetic acid <sup>(c)</sup> | ↑ | 0.664 | 1.85E-05 | 4.73E-05 |
| L-Arginine <sup>(b)</sup>            | ↓ | 0.729 | 1.11E-06 | 1.50E-07 | Choline <sup>(b)</sup>                 | ↑ | 0.671 | 4.14E-07 | 6.25E-07 | Hydroxypropionic acid <sup>(a)</sup>      | ↑ | 0.663 | 2.32E-07 | 2.30E-06 |

Metabolite Name, (a) RPLC Neg, (b) RPLC Pos, and (c) HILIC; Trend, average normalized intensity of lung cancer patients compared with the controls.

## A. Methods

### The detailed information of metabolomic analyses

#### LC-MS and LC-MS/MS

An Ultimate-3000 UPLC system coupled to a Q Exactive hybrid quadrupole-Orbitrap MS system (Thermo Scientific) was used for the sample analysis. Before injection, the residues were resuspended in platform-specific solutions. A combination of three conditions: (A) Hydrophilic interaction liquid chromatography (HILIC)-MS with ESI+/ESI- switching mode; (B) Reversed-phase liquid chromatography (RPLC)-MS with ESI+ mode; and (C) RPLC-MS with ESI- mode, was used for the untargeted metabolomic analysis. The obtained residue was prepared in 100  $\mu$ L of acetonitrile/water (1:1, v/v) for the HILIC-MS analysis, and 2-chloro-L-phenylalanine was used as an internal standard. The residue was made in 100  $\mu$ L of 80% methanol for the RPLC-MS analysis, and 2-Chloro-L-phenylalanine, hexanoyl-L-carnitine-(N-methyl-d3), lysophosphatidylcholine 12:0, and nonadecanoic-d37 acid were used as internal standards.

Gradient Profile for HILIC-MS Method: An Acquity UPLC BEH Amide column (1.7  $\mu$ m  $\times$  2.1 mm  $\times$  100 mm, Waters) with a VanGuard pre-column was used. The column temperature was set at 40°C. The mobile phases were 20mM ammonium acetate and 20mM ammonium hydroxide in water/acetonitrile (95:5, v:v) (A) and acetonitrile (B). The flow rate was 0.35 mL/min and the injection volume was 5  $\mu$ L. The gradient was 85% B in 0–1.0 min, 85–65% B in 1.0–12.0 min, 65–40% B in 12.0–12.1 min, 40% B in 12.1–15.0 min, 40–85% B in 15.0–15.1 min, and 85% B in 15.1–20.0 min. All the samples were kept at 4°C during the analysis.

Gradient Profiles for RPLC-ESI+/MS Methods: A Hypersil GOLD C18 column (1.9  $\mu$ m  $\times$  2.1 mm  $\times$  100 mm, Thermo Scientific) with a guard filter was used. The column temperature was set at 45°C. For ESI+ mode, the mobile phases were 2% water in acetonitrile with 0.1% formic acid (A) and 5% acetonitrile in water with 0.1% formic acid (B). The flow rate was 0.30 mL/min and the injection volume was 5  $\mu$ L. The gradient was 100% B in 0–1.5 min, 100–80% B in 1.5–10.0 min, 80–3% B in 10.0–14.5 min, 3–100% B in 14.5–14.6 min, 100% B in 14.6–18.0 min. All the samples were kept at 4°C during the analysis.

Gradient Profiles for RPLC-ESI-/MS Methods: A Hypersil GOLD C8 column (1.9  $\mu$ m  $\times$  2.1 mm  $\times$  100 mm, Thermo Scientific) with a guard filter was used. The column temperature was set at 45°C. The mobile phases were 20% isopropanol in acetonitrile (A) and 5% acetonitrile in water with 10 mmol ammonium acetate (pH was adjusted to 5.0 by acetic acid) (B). The flow rate was 0.30 mL/min and the injection volume was 5  $\mu$ L. The gradient was 70% B in -3.5–0.0 min, 70–40% B in 0.0–3.0 min, 40–0% B in 3.0–12.5 min, 0% B in 12.5–16.0 min, and 0–70% B in 16.0–16.5 min. All the samples were kept at 4°C during the analysis.

Electrospray ionization in both of the liquid condition was carried out using the following conditions. Full scan data was acquired in positive, negative, or positive/negative ion switching modes in profile mode at 70,000 resolution (at m/z range 70–1050), an automatic gain control target of 3e6, with spray voltages +3.0 kV and -2.5 kV. The capillary temperature was set at 350°C with the sheath gas flow rate at 45 arb and aux gas flow rate at 15 arb. The heater temperature was set at 350°C. The S-Lens RF level was set at 50.

The MS/MS was operated at a resolving power of 70,000 in full-scan mode (scan range: 70-1050 m/z); automatic gain control target: 1e6 both in positive and negative ion mode) and of 17,500 in the Top10 data-dependent MS2 mode (stepped normalized collision energy: 15, 30 and 45 in all positive mode and negative mode for **RPLC-ESI**, while 30, 45, 60 in negative ion mode for HILIC method; Injection time: 100 ms; Isolation window: 4.0 m/z; automatic gain control target: 2e5) with dynamic exclusion setting of 6.0 s.

#### Data Preprocessing

MS raw data were acquired using the software Xcalibur (version 3.1, Thermo Scientific). The spectra selection, retention time alignment, and peak identification were performed using Compound Discoverer (version 3.0, Thermo Scientific), to obtain the data matrix containing molecular weight, retention time, peak intensity and annotation result. A workflow named “Untargeted Metabolomics with statistics detect unknowns with ID using Online Database and mzLogic” was chosen to process. Key processing parameters were: Mass Tolerance, 10 ppm; RT Tolerance, 0.2 min for RPLC and 0.5 min for HILIC; Max Peak Width, 0.5 min for RPLC and 0.6 min for HILIC; Min Peak Intensity, 500,000. The metabolites were identified by exact masses and fragmentation spectra with databases such as

mzCloud, ChemSpider, LipidBlast and Fiehn HILIC database. The free fatty acids were further identified by reference standards. A support vector regression-based normalization method [Normalization and integration of large-scale metabolomics data using support vector regression. *Metabolomics*, 2016, 12:89] was then used to reduce unwanted variations in such a large-scale metabolomics study.

The normalized dataset was then imported into SIMCA (V15.0, Umetrics, Umeå, Sweden) for further multivariate statistical analysis [Urinary metabolomic study of non-small cell lung carcinoma based on ultra-high performance liquid chromatography coupled with quadrupole time-of-flight mass spectrometry. *Journal of Separation Science*, 2014, 37:1728-1735.]. Principal component analysis (PCA) and orthogonal projection on latent structure discriminant analysis (OPLS-DA) were performed to visualize the metabolic alterations between lung cancer patients and healthy controls after mean centering and unit variance scaling. Pareto scaling was further used for OPLS-DA. The OPLS-DA model was adapted after performing a permutation test running 200 times, including the default seven-round cross-validation with one-seventh of the samples being excluded in each round to rule out overfitting. The variable importance in projection values (VIPs) and p values of Student's t-test were used to measure the significance of each variable. Metabolites with  $VIP > 1$  and  $p < 0.05$  were identified as different metabolites between two groups. MetaboAnalyst 4.0 was used to identify a variety of functional enrichment analysis and metabolic pathways.



## B. Multivariate Modeling: Healthy Control vs. Stage I & II Lung Cancer, Healthy Control vs. Stage III & IV Lung Cancer

In order to establish a discriminant model for identifying early-stage lung cancer from healthy people, a discovery cohort of 50 healthy control samples and 35 early-stage (stage I and stage II) samples was adopted to find prominent metabolites and train the discriminant model. A held-out validation cohort consisting of 25 healthy controls and 17 early-stage cancer patients was used to validate the performance of the well-trained models. Table 4 describes the discriminative model involving the five best significant plasma metabolites identified from the above section: Palmitic acid, Heptadecanoic acid, Ornithine, Tridecanoic acid, and Stearic acid.

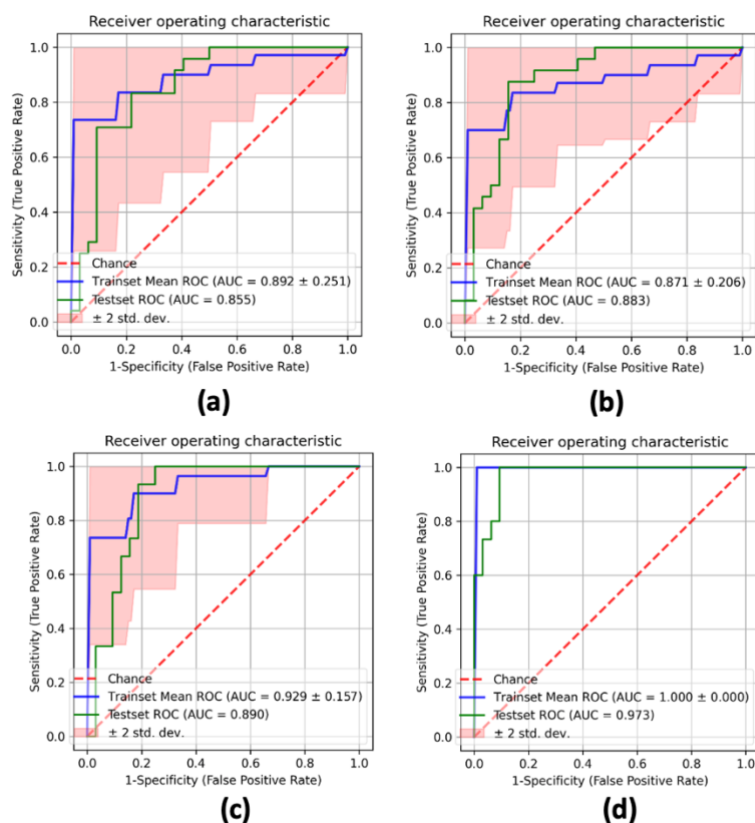

**Figure S6 (a)-(b)** Receiver-operating characteristic (ROC) curves for discriminating healthy controls and early-stage lung cancer patients [(a) ROC curves of the logistic model using top 5 metabolomic markers; (b) ROC curves of the logistic model using top 10 metabolomic markers]. **(c)-(d)** Receiver-operating characteristic (ROC) curves for discriminating healthy controls and advanced-stage lung cancer patients [(c) ROC curves of the logistic model using top 5 metabolomic markers; (d) ROC curves of the logistic model using top 10 metabolomic markers].

**Table S6.** Performance of logistic regression models with various biomarkers for discriminating healthy controls and early-stage lung cancer patients.

|                  | Classifier with the top five significant metabolites |            | Classifier with the top ten significant metabolites |            |
|------------------|------------------------------------------------------|------------|-----------------------------------------------------|------------|
|                  | Discovery                                            | Validation | Discovery                                           | Validation |
| <b>AUC</b>       | 0.892 (+/- 0.251)                                    | 0.855      | 0.871 (+/- 0.206)                                   | 0.883      |
| <b>Accuracy</b>  | 0.805 (+/- 0.240)                                    | 0.768      | 0.808 (+/- 0.236)                                   | 0.857      |
| <b>Precision</b> | 0.843 (+/- 0.398)                                    | 0.769      | 0.852 (+/- 0.377)                                   | 0.860      |

|               |                   |       |                   |       |
|---------------|-------------------|-------|-------------------|-------|
| <b>Recall</b> | 0.736 (+/- 0.291) | 0.768 | 0.736 (+/- 0.395) | 0.857 |
|---------------|-------------------|-------|-------------------|-------|

Using the metabolites in Table S6, a linear relationship,  $\log(P/(1-P)) = 4.84E-05 - 3.62E-05 \times \text{Palmitic acid} - 7.29E-04 \times \text{Heptadecanoic acid} + 6.43E-03 \times \text{Ornithine} - 1.92E-02 \times \text{Tridecanoic acid} + 1.48E-05 \times \text{Stearic acid}$ , was used for calculations. The optimal threshold (cut-off point) for the above logistic model is 0.338. From Figures S6 (a) (b) and Table S6, we can see that after using this held-out validation, the AUC can increase from 85.5% to 88.7% using top ten significant metabolites to identifying early-stage lung cancer from healthy people.

We also established a discriminant model for identifying advanced-stage lung cancer from healthy people. A discovery cohort of 50 healthy control samples and 29 advanced-stage (stage III and stage IV) samples was adopted to find prominent metabolites and train the discriminant model. A held-out validation cohort consisting of 25 healthy controls and 15 advanced-stage cancer patients was used to validate the performance of the well-trained model.

**Table S7.** Performance of logistic regression models with various biomarkers for discriminating healthy controls and advanced-stage lung cancer patients.

|                  | <b>Classifier with the top five significant metabolites</b> |            | <b>Classifier with the top ten significant metabolites</b> |            |
|------------------|-------------------------------------------------------------|------------|------------------------------------------------------------|------------|
|                  | Discovery                                                   | Validation | Discovery                                                  | Validation |
| <b>AUC</b>       | 0.929 (+/- 0.157)                                           | 0.890      | 1.000 (+/- 0.000)                                          | 0.973      |
| <b>Accuracy</b>  | 0.786 (+/- 0.245)                                           | 0.851      | 0.973 (+/- 0.086)                                          | 0.915      |
| <b>Precision</b> | 0.798 (+/- 0.376)                                           | 0.879      | 0.976 (+/- 0.117)                                          | 0.921      |
| <b>Recall</b>    | 0.714 (+/- 0.306)                                           | 0.851      | 0.964 (+/- 0.175)                                          | 0.915      |

Using the metabolites in Table S7, a linear relationship,  $\log(P/(1-P)) = 3.31E-05 - 4.22E-05 \times \text{Palmitic acid} - 2.42E-03 \times \text{Heptadecanoic acid} + 7.69E-03 \times \text{Ornithine} - 9.44E-03 \times \text{Tridecanoic acid} - 2.01E-07 \times \text{Stearic acid}$ , was used. The optimal threshold (cut-off point) for the above logistic model is 0.271. The results from Figures S6 (c) (d) and Table S7, show that we can obtain a good model to discriminating healthy controls versus advanced-stage lung cancer patients, and healthy controls versus early-stage lung cancer patients separately with validation accuracy all above 0.85.

### C. Linear Relationship for the Logistic Regression Models

- The linear relationship for discriminating lung cancer from healthy controls is:

$$\log(P/(1-P)) = 3.07E-05 - 5.79E-05 \times \text{Palmitic acid} - 2.32E-03 \times \text{Heptadecanoic acid} + 5.91E-03 \times \text{Oxoproline} - 1.17E-02 \times \text{Tridecanoic acid} + 6.19E-03 \times \text{Ornithine}.$$

The optimal threshold (cut-off point) for the above logistic regression model is 0.572.

- The linear relationship for the health stage is

$$\log(P/(1-P)) = -1.84E-06 + 2.01E-05 \times \text{Palmitic acid} + 6.83E-04 \times \text{Heptadecanoic acid} - 2.91E-03 \times \text{Ornithine} + 1.50E-04 \times \text{Tridecanoic acid} + 2.38E-05 \times \text{Stearic acid}.$$

The optimal threshold (cut-off point) for the above model is 0.541.

- The linear relationship for the early-stage is

$$\log(P/(1-P)) = 1.25E-06 - 1.01E-06 \times \text{Palmitic acid} - 1.34E-04 \times \text{Heptadecanoic acid} + 1.21E-03 \times \text{Ornithine} - 1.03E-04 \times \text{Tridecanoic acid} - 2.57E-05 \times \text{Stearic acid}.$$

The optimal threshold (cut-off point) for the above model is 0.327.

- The linear relationship for the advanced-stage is

$$\log(P/(1-P)) = 5.88E-07 - 1.91E-05 \times \text{Palmitic acid} - 5.49E-04 \times \text{Heptadecanoic acid} + 1.70E-03 \times \text{Ornithine} - 4.68E-05 \times \text{Tridecanoic acid} + 1.95E-06 \times \text{Stearic acid}.$$

The optimal threshold (cut-off point) for the above model is 0.238.
